## **IT'S NOT YOU, IT'S ME: COROLLARY DISCHARGE IN PRECEREBELLAR NUCLEI OF SLEEPING INFANT RATS**

Didhiti Mukherjee<sup>1,5</sup>, Greta Sokoloff<sup>1,4,5</sup>, and Mark S. Blumberg<sup>1,2,3,4,5</sup>

<sup>1</sup> Department of Psychological and Brain Sciences, University of Iowa, Iowa City, Iowa

<sup>2</sup> Interdisciplinary Graduate Program in Neuroscience, University of Iowa, Iowa City, Iowa

<sup>3</sup> Department of Biology, University of Iowa, Iowa City, Iowa

<sup>4</sup> Iowa Neuroscience Institute, University of Iowa, Iowa City, Iowa

<sup>5</sup> Delta Center, University of Iowa, Iowa City, Iowa

## 1 **ABSTRACT**

2 In week-old rats, somatosensory input arises predominantly from stimuli in the external  
3 environment or from sensory feedback associated with myoclonic twitches during active  
4 (REM) sleep. A previous study of neural activity in cerebellar cortex raised the possibility  
5 that the brainstem motor structures that produce twitches also send copies of motor  
6 commands (or corollary discharge, CD) to the cerebellum. Here, by recording from two  
7 precerebellar nuclei—the inferior olive and lateral reticular nucleus—we demonstrate that  
8 CD does indeed accompany the production of twitches. Within both structures, the CD  
9 signal comprises a surprisingly sharp activity peak within 10 ms of twitch onset. In the  
10 inferior olive, this sharp peak is attributable to the opening of slow potassium channels.  
11 We conclude that a diversity of neural activity is conveyed to the developing cerebellum  
12 preferentially during sleep-related twitching, enabling cerebellar processing of convergent  
13 input from CD and reafferent signals.

## 1 INTRODUCTION

2 The sensorimotor systems of diverse vertebrate and invertebrate species distinguish  
3 signals arising from self-generated movements (i.e., reafference) from those arising from  
4 other-generated movements (i.e., exafference; Cullen, 2004). To make this distinction,  
5 motor structures generate copies of motor commands, referred to as corollary discharge  
6 (CD; Crapse and Sommer, 2008; Poulet and Hedwig, 2007). CD is conveyed to non-motor  
7 structures to inform them of the imminent arrival of reafference arising from self-generated  
8 movements (Crapse and Sommer, 2008). By comparing the two signals, animals are able  
9 to distinguish between self-produced and other-produced movements.

10 Self-produced movements are not restricted to periods of wakefulness, especially  
11 during development. Infants produce brief, discrete, jerky movements of skeletal muscles  
12 during active sleep (AS or REM sleep), which is the predominant behavioral state during  
13 early infancy (Jouvet-Mounier et al., 1970; Roffwarg et al., 1966). These spontaneous  
14 movements are known as myoclonic twitches, and are among the most conspicuous  
15 behaviors during development in a diversity of species (Blumberg et al., 2013;  
16 Gramsbergen et al., 1970; Jouvet-Mounier et al., 1970; Roffwarg et al., 1966).

17 It was recently reported in week-old rats that the external cuneate nucleus (ECN), a  
18 medullary nucleus that receives proprioceptive input from the forelimbs, actively inhibits  
19 reafference arising from wake-related limb movements but not those arising from twitches  
20 (Tiriatic and Blumberg, 2016). This state-dependent gating by the ECN suggested the  
21 selective engagement of a CD mechanism during wake movements and its suspension  
22 during twitching. It remained unclear, however, whether the suspension of the gating  
23 mechanism reflected the absence of a twitch-related CD signal or the inhibition of CD's

1 effects within the ECN. Determining whether twitches are accompanied by CD has  
2 implications for their functional role in the self-organization of the sensorimotor system.

3 There is some suggestive evidence that twitches are accompanied by CD. In week-old  
4 rats, twitches trigger both complex spikes (arising from climbing fibers) and simple spikes  
5 (arising from mossy fibers) in cerebellar Purkinje cells (Sokoloff et al., 2015a). These  
6 neural events were detected at very short latencies that appear too short for refferent  
7 signals arising from the periphery (Puro and Woodward, 1977a; Puro and Woodward,  
8 1977b). Accordingly, it is possible that the motor structures that produce twitches also  
9 convey CD to the cerebellum, as occurs with waking movements in adults (Azim and  
10 Alstermark, 2015; Azim et al., 2014).

11 If twitch-related CD reaches cerebellar cortex, it must be conveyed through the  
12 precerebellar nuclei. The inferior olive (IO) is a good candidate structure for such a CD  
13 signal. First, it is the sole source of climbing fibers to cerebellar cortex and is therefore  
14 responsible for the triggering of complex spikes (Ruigrok et al., 2014). Second, midbrain  
15 motor structures, including Nucleus of Darkschewitsch, project directly to the IO (De  
16 Zeeuw et al., 1998). Finally, the IO fires precisely at the onset of self-generated  
17 movements in waking adults (Keating and Thach, 1995; Welsh et al., 1995).

18 With respect to mossy fibers, there are a few major candidate structures to consider  
19 (Ruigrok et al., 2014). First, the pontine nucleus is an unlikely source of CD in week-old  
20 rats because it receives descending input from motor cortex (Lee and Mihailoff, 1990),  
21 which does not contribute to the production of twitches (Blumberg, 2010; Kreider and  
22 Blumberg, 2000). Second, the ECN can also be ruled out as a source of CD because it  
23 has been demonstrated to process twitch-related refference exclusively (Tiriac and

1 Blumberg, 2016). Finally, the LRN is a viable candidate because it receives both sensory  
2 input from the limbs and motor input from midbrain structures, including the red nucleus  
3 (Alstermark and Ekerot, 2013; Pivetta et al., 2014). Moreover, the LRN has been  
4 implicated in processing CD associated with self-generated movements in adults  
5 (Alstermark and Ekerot, 2015; Arshavsky et al., 1978).

6 Accordingly, we recorded neural activity in the IO and LRN in postnatal day (P) 7-9  
7 (hereafter P8) rats. In the majority of IO units and a subset of LRN units, twitch-related  
8 activity was remarkably precise, exhibiting a sharp activity peak within  $\pm 10$  ms of a twitch.  
9 This sharp peak, centered so tightly around twitch onset, is most parsimoniously explained  
10 as CD. Next, we identified adjacent, non-overlapping midbrain motor areas that are  
11 involved in the production of twitches and that are likely sources of CD to the IO and LRN.  
12 Finally, we demonstrate that calcium-activated slow potassium (SK) channels in the IO are  
13 responsible for sharpening the broad CD signal arriving from motor structures.

14 Altogether, the twitch-related activity peaks in the IO and LRN reported here satisfy the  
15 major criteria put forward for identifying CD (Poulet and Hedwig, 2007; Sommer and Wurtz,  
16 2008). To our knowledge, these findings provide the first direct neurophysiological  
17 evidence of a CD signal in an infant mammal.

18

## 19 **RESULTS**

### 20 **IO activity predominates during active sleep**

21 We recorded IO activity in unanesthetized head-fixed pups as they cycled spontaneously  
22 between sleep and wake with their limbs dangling freely (n=20 pups, 37 units, 1-4  
23 units/pup). Electromyography (EMG) and behavioral scoring were used to identify

1 behavioral state and detect sleep and wake movements (Blumberg et al., 2015; Figure  
2 1A).

3 Electrode placement within the IO was confirmed histologically (Figure 1B). Recording  
4 sites were located within the dorsal accessory olive (DAO; n=19 units across 12 pups) or  
5 the medial accessory olive (MAO) and the principal olive (PO; n=18 units across 8 pups;  
6 Figure 1C). Overall, unit activity was phasic and largely restricted to periods of AS; also,  
7 activity appeared to be suppressed immediately after the onset of active wake (AW).  
8 Sparse activity was observed during behavioral quiescence (BQ), which is a period of low  
9 muscle tone interposed between AW and AS (Figure 1D). The majority (24/35 units, 69%)  
10 of IO units were AS-on (Figure 1E) and the mean firing rate of the AS-on units ( $2.9 \pm 0.4$   
11 Hz) was approximately three times higher during AS than for the other two states  
12 ( $p < 0.0005$ ; Figure 1F). Two IO units were excluded from state analysis due to movement  
13 artifact during AW.

14

### 15 **IO neurons exhibit sharp activity peaks at twitch onset**

16 The phasic IO activity clustered around periods of myoclonic twitching; therefore, we  
17 examined the temporal relationship between twitches and unit activity by creating  
18 perievent histograms (5-ms bins, 1-s window) with unit activity triggered on twitch onset.

19 Previous studies have revealed two distinct patterns of twitch-triggered perievent  
20 histograms in sensorimotor structures (Figure 2A). First, in a motor structure like the RN  
21 (green trace in Figure 2A), unit activity increases 20-40 ms before the onset of a twitch  
22 (Del Rio-Bermudez et al., 2015). Second, in a sensory structure like the ECN (blue trace  
23 in Figure 2A), unit activity increases at least 10-50 ms after the onset of a twitch (Tiriac

1 and Blumberg, 2016). In the IO, however, we found that the majority of units (23/37 units,  
2 62%) were active within  $\pm 10$  ms of the onset of a twitch (Figure 2B, C). These IO activity  
3 profiles were very sharp and thus strikingly different from those observed in any of the  
4 motor and sensory structures from which we have previously recorded (e.g., see Figure  
5 2D). Also, the IO units that exhibited this profile were responsive primarily to nuchal and/or  
6 forelimb twitches and rarely to hindlimb twitches (Figure 2—figure supplement 1A-D).  
7 Finally, the characteristics of the neural responses recorded in the IO did not appear to  
8 differ across anatomical subdivisions.

9 There are three possible explanations for these sharply peaked activation patterns  
10 observed in IO units: (a) the IO is part of the motor pathway, (b) the IO receives reafference  
11 from twitches, and (c) the IO receives CD from a motor structure that produces twitches.  
12 With respect to (a), the IO, despite being implicated in the precise timing of motor  
13 behaviors (De Zeeuw et al., 1998), is not directly involved in the generation of movements  
14 (Horn et al., 2004; Lang et al., 2017). Although it receives afferent projections from motor  
15 areas (Saint-Cyr, 1983; Saint-Cyr and Courville, 1981), there are no efferent projections  
16 from the IO to spinal motor neurons. In fact, the sole efferent projection from the IO  
17 comprises the climbing fibers that innervate cerebellar Purkinje cells (Ruigrok et al., 2014).  
18 Consequently, in adults, stimulation of the IO does not evoke or modulate movements  
19 (Gellman et al., 1985).

20 With respect to (b), although the IO can receive short-latency reafferent signals  
21 (Gellman et al., 1983; Sedgwick and Williams, 1967), it is unlikely that reafference can  
22 account for the short-latency peaks observed here. Consider that for the structures in  
23 which we have seen clear evidence of twitch-related reafference (e.g., ECN), we have also

1 seen clear evidence of exafferent responses (Tiriach et al., 2014; Tiriach and Blumberg,  
2 2016). In contrast, of the IO units that exhibited sharp peaks with a latency of  $\pm 10$  ms,  
3 none responded to exafferent stimulation. Moreover, of the 7 IO units that exhibited twitch-  
4 triggered responses at latencies consistent with reafferent processing (i.e.,  $> 10$  ms; Figure  
5 2-figure supplement 1E), 3 responded to exafferent stimulation. Thus, the signature  
6 feature of the majority of IO activity—the sharp peak centered on twitch onset—is  
7 consistent with the notion that the IO receives CD associated with the production of a  
8 twitch.

9

## 10 **LRN neurons exhibit two kinds of twitch-related activity**

11 Based on research in adults (Alstermark and Ekerot, 2015; Arshavsky et al., 1978), we  
12 predicted that the LRN, like the IO, would exhibit CD-related activity. Moreover, because  
13 the LRN also receives sensory inputs from the limbs (Figure 3A), we expected to see  
14 evidence of reafference in that structure. To test these two possibilities, we next recorded  
15 spontaneous LRN activity in P8 rats across sleep and wake.

16 We confirmed electrode placements in the LRN ( $n=27$  units across 9 pups, 1-6  
17 units/pup; Figure 3B). Similar to the IO, the unit activity in the LRN was phasic and  
18 restricted to periods of AS, particularly around twitches. LRN activity was sparse during  
19 BQ and was suppressed after AW onset (Figure 3C). The majority (16/27 units, 59%) of  
20 LRN units were AS-on (Figure 3D) and the mean firing rate of the AS-on units ( $1.4 \pm 0.2$   
21 Hz) was approximately three times higher during AS than during any of the other two states  
22 ( $p < 0.0005$ ; Figure 3E).



1 Next, we assessed the temporal relationship between unit activity and twitches by  
2 creating perievent histograms (5-ms bins, 1-s window). Regardless of state dependency,  
3 the majority of LRN units (24/27 units, 89%) showed significant increases in firing rate in  
4 response to a twitch (Figure 3F). As predicted, we observed two different neural  
5 populations that exhibited distinct patterns of twitch-triggered activity. First, we found a  
6 subpopulation of LRN units (12/27 units, 44%) that, like the majority of IO units, exhibited  
7 a sharp peak within  $\pm 10$  ms of a twitch (Figure 3G, left); also, none of these LRN units  
8 responded to exafferent stimulation of the limbs (data not shown).

9 Second, the remaining LRN units (12/27 units, 44%) exhibited broader twitch-related  
10 activity profiles consisting of a peak in activity around twitch onset ( $\pm 10$  ms) and/or a peak  
11 with a latency of  $>10$  ms (Figure 3G, right). The latter peak is what is expected from a  
12 short-latency reafferent responses (Tiriac and Blumberg, 2016; Tiriac et al., 2014). Indeed,  
13 6 of these 12 units also responded to exafferent stimulation of either the forelimb or  
14 hindlimb with an average latency of 40 ms (Figure 3H).

15

## 16 **Non-overlapping regions in the mesodiencephalic junction (MDJ)** 17 **project to the IO and LRN**

18 The MDJ includes diverse structures, like the RN, that innervate spinal motor neurons (De  
19 Zeeuw et al., 1998; Saint-Cyr and Courville, 1981; Lakke, 1997; Onodera and Hicks, 2009;  
20 Zuk et al., 1983) and are therefore directly involved in the generation of movements  
21 (Fukushima, 1991; Morris et al., 2015; Onodera and Hicks, 1996; Williams et al., 2014).  
22 To determine whether MDJ neurons also project to the IO and LRN at P8, we performed  
23 retrograde tracing from each structure.

1 Wheat germ agglutinin (WGA) conjugated with Alexa Fluor 488 or 555 was  
2 microinjected into the IO or LRN and retrogradely labelled cell bodies were imaged using  
3 a fluorescent microscope. Retrograde tracing from the IO (n=5; Figure 4A) revealed robust  
4 labeling of cell bodies in the mesodiencephalic junction (MDJ), including the rostral  
5 interstitial nucleus of Cajal (RI), nucleus of Darkschewitsch (Dk), accessory oculomotor  
6 nuclei (MA3), and nearby diffuse areas in the MDJ. Little or no labelling was observed in  
7 the RN. In contrast, retrograde tracing from the LRN (n=4; Figure 4B) revealed robust  
8 labeling in the contralateral RN but not elsewhere in the MDJ. Finally, when the two  
9 different tracers were injected separately into the IO and LRN of the same pup (n=2; Figure  
10 4C), we found that the LRN-projecting cell bodies were located within the RN and the IO-  
11 projecting cell bodies were located outside the RN. These findings are consistent with  
12 those in adult rats (Ruigrok et al., 2014) and suggest that the major afferent connections  
13 to the IO and LRN arise from non-overlapping structures in the MDJ at this age.

14

## 15 **MDJ stimulation causes limb movements and c-Fos activation in the IO** 16 **and LRN**

17 To assess functional connectivity between the MDJ and the IO or LRN, we electrically  
18 stimulated the RN (n=4) and other MDJ nuclei (n=4) while monitoring forelimb and hindlimb  
19 movements in urethanized (1.5mg/g, IP) P8 rats (Figure 4—figure supplement 1A).  
20 Subsequently, we performed immunohistochemistry to determine the expression of the c-  
21 Fos protein, a marker of neural activity (Chung, 2015), in the IO and LRN.

22 Stimulation of several non-RN MDJ nuclei evoked non-specific movements of the  
23 ipsilateral and contralateral forelimbs and hindlimbs and also resulted in c-Fos expression

1 primarily in the ipsilateral IO (Figure 4—figure supplement 1B). In contrast, stimulation of  
2 the RN produced only discrete contralateral forelimb movements (Figure 4—figure  
3 supplement 1A) and resulted in c-Fos expression in the contralateral LRN but not the IO  
4 (Figure 4—figure supplement 1C). These results indicate that MDJ nuclei are functionally  
5 connected to the IO and LRN at these ages.

6 It is possible that the c-Fos activation in the IO and LRN was due to sensory feedback  
7 arising from the stimulated movements. However, we observed little or no c-Fos  
8 expression in sensory areas like the cuneate nucleus and ECN (data not shown).

9

## 10 **MDJ neurons adjacent to the RN are active before and after the** 11 **production of twitches**

12 It has been established that the RN is involved in the production of twitches (Del Rio-  
13 Bermudez et al., 2015) and, as shown here, in the conveyance of CD to the LRN. Similarly,  
14 if MDJ neurons outside of the RN convey twitch-related CD to the IO, we would also expect  
15 these neurons to be involved in the production of twitches (Figure 5A). Therefore, we  
16 characterized the spontaneous activity of non-RN MDJ neurons in P8 rats during sleep  
17 and wake. We aimed to record from MDJ neurons located in regions implicated earlier as  
18 projecting to the IO and, upon stimulation, producing limb movements (see Figure 4 and  
19 Figure 4—figure supplement 1).

20 Electrode placements in the MDJ immediately medial to the RN were confirmed (n=7  
21 pups, 17 units, 1-5 units/pup; Figure 5B). The spontaneous activity of neurons in this  
22 region appeared mostly around twitches and wake movements (Figure 5C). When twitch-  
23 triggered perievent histograms (10-ms bins, 1-s window) were created, we found that the

1 majority of the recorded units (15/17 units, 88%) showed significant twitch-dependent  
2 activity (Figure 5D).

3 The temporal relationship between neural activity and twitches revealed two primary  
4 subpopulations of units (Figure 5D): There were units that significantly increased their  
5 firing rates before the onset of a twitch (twitch-preceding units) and units that significantly  
6 increased their firing rates after the onset of a twitch (twitch-following units). The twitch-  
7 preceding units (10/17 units across 5 pups, 59%) showed an increase in firing rate 10-70  
8 ms before a twitch (Figure 5E, left). Interestingly, the majority (7/10 units, 70%) of these  
9 twitch-preceding units also exhibited an increase in firing rate 10-50 ms after a twitch,  
10 indicative of reafference. The twitch-following units (5/17 units across 3 pups, 29%)  
11 showed an increase in firing rate 20-40 ms after a twitch (Figure 5E, right), suggesting they  
12 only receive reafference from a twitch. In terms of pattern and latency of twitch-triggered  
13 activity, these neurons behave similarly to those described previously in the RN (Figure  
14 5F; Del Rio-Bermudez et al., 2015).

15 The twitch-preceding MDJ neurons also significantly increased their activity before the  
16 onset of wake movements (Figure 5—figure supplement 1A), consistent with that observed  
17 in the RN (Del Rio-Bermudez et al., 2015). Similarly, the IO units that exhibited twitch-  
18 related CD also significantly increased their firing rate at the onset of wake movements  
19 (Figure 5—figure supplement 1B). A similar pattern was observed in the LRN (data not  
20 shown). Therefore, the IO and LRN receive CD from the MDJ associated with both types  
21 of movements, although wake-related activity is less abundant and pronounced than  
22 twitch-related activity.

23

## 1 **Calcium-activated slow-potassium (SK) channels contribute to the** 2 **sharp peak in IO activity**

3 Having identified motor structures that send CD to the IO and LRN, we next sought to  
4 determine how a motor command with a broad twitch-preceding peak (see Figure 5F) is  
5 transformed into a sharp, precise peak around a twitch (see Figure 2B). We focused on  
6 the IO to address this question because of the reliably high percentage of units that exhibit  
7 twitch-related CD.

8 In the adult IO, SK channels prevent temporal summation of excitatory presynaptic  
9 inputs (Garden et al., 2017). SK channels are also expressed early in development  
10 (Gymnopoulos et al., 2014). Because afferent projections from the MDJ to the IO are  
11 excitatory, we hypothesized that twitch-related CD conveyed to the IO is accompanied by  
12 the opening of SK channels, thereby truncating IO activity and resulting in the observed  
13 sharp twitch-related peaks. To test this hypothesis, we blocked SK channels using apamin,  
14 an SK channel antagonist (Benington et al., 1995); apamin has been used in adult rats to  
15 block SK channels in the IO (Lang et al., 1997).

16 P8 rats were prepared for neurophysiological recording as described earlier. After the  
17 pup was cycling between sleep and wake, apamin (1  $\mu$ M; dissolved in saline) or saline—  
18 mixed with 4% fluorogold to later identify the extent of diffusion—was microinjected at a  
19 volume of 100 nl into the IO. Fifteen min after the injection (the half-life of apamin is  $\sim$ 2 h;  
20 Gui et al., 2012), the microsyringe was withdrawn and was replaced with a recording  
21 electrode. Neural and EMG activity and sleep-wake behavior were then recorded for 30  
22 min (Figure 6A).

1 We confirmed drug or vehicle diffusion and recording sites within the IO (n=18 units  
2 across 10 pups in the saline group; n= 21 units across 8 pups in the apamin group; 1-3  
3 units/pup; Figure 6B). There was no difference in the amount of time spent in AS (p=0.78)  
4 or in the number of twitches produced per unit time of AS between the apamin and saline  
5 groups (ps>0.15 for nuchal, contralateral and ipsilateral forelimb twitches; Figure 6—figure  
6 supplement 1A, B). As observed in the previous IO recordings, neural activity in both  
7 groups was phasic and restricted to periods of AS (Figure 6—figure supplement 1C).  
8 There was no significant difference in the overall firing rate during AS between groups  
9 (p=0.59; Figure 6—figure supplement 1D).

10 Perievent histograms (10-ms bins, 1-s window) were created for each individual unit in  
11 both groups (Figure 6C). As predicted, whereas twitch-triggered activity in the saline group  
12 exhibited the expected sharp peak around twitches, the activity in the apamin group was  
13 broader during the period after twitch onset.

14 The number of units exhibiting significant twitch-related activity did not differ between  
15 the two groups (n=13/18 in saline and n=11/21 in apamin groups;  $\chi^2(1, N=39) = 1.6, p=0.2$ ;  
16 Figure 6D). In contrast, the number of units exhibiting sharp peaks within  $\pm 10$  ms of a  
17 twitch was significantly lower in the apamin group (5/21 units, 24%) than in the saline group  
18 (11/18 units, 61%;  $\chi^2(1, N=39) = 5.6, p=0.02$ ; Figure 6D). To illustrate the effect of apamin  
19 on twitch-related activity, we pooled the data for the significant units to create perievent  
20 histograms of IO activity. As shown in Figure 6E, the activity in the apamin group, unlike  
21 that in saline group, persisted beyond the 10-ms window after a twitch. To quantify the  
22 difference, we calculated the area under the curve for each unit during two time windows:  
23  $\pm 10$  ms around a twitch and 20-200 ms after a twitch (Figure 6F). As expected, we found

1 no significant difference between the two groups in the  $\pm 10$ -ms window ( $U=56.5$ ,  $Z=-0.87$ ,  
2  $p=0.4$ ), but did find a significant difference for the 20-200-ms window, with the apamin  
3 group being significantly larger ( $U=30.5$ ,  $Z=-2.2$ ,  $p=0.03$ ). In fact, the pattern of twitch-  
4 triggered neural activity in the apamin group was similar to that recorded in the MDJ  
5 (Figure 6G). Based on these results, we conclude that SK channels are involved in  
6 sharpening the CD signal arriving from the MDJ.

7

## 8 **DISCUSSION**

9 Several criteria have been proposed for identifying CD signals (Poulet and Hedwig, 2007;  
10 Sommer and Wurtz, 2008). First, a CD should originate in a structure that is demonstrably  
11 involved in the production of movement; as shown here, the twitch-related activity in the  
12 IO and LRN originates from several independent motor structures in the MDJ that are  
13 involved in the production of twitches and wake movements (Del Rio-Bermudez et al.,  
14 2015). Second, areas receiving CD should themselves play no direct role in the production  
15 of movement; this is clearly true of the IO and LRN (Gellman et al., 1985; Ruigrok et al.,  
16 2014). Third, neurons receiving CD should increase their activity at the onset of a  
17 movement; as shown here, the activity of IO and LRN neurons occurs precisely at the  
18 onset of twitches, exhibiting a temporal profile that clearly distinguishes it from twitch-  
19 preceding activity in the MDJ nuclei and twitch-following activity in the ECN. Thus, the  
20 twitch-related activity in the IO and LRN satisfies the key criteria of CD. Below we discuss  
21 the implications of this finding and its significance for sensorimotor development.

22

## 23 **Neurophysiological identification of CD signals in behaving animals**

1 Neural pathways conveying CD have been delineated in a diverse array of species (Dale  
2 and Cullen, 2017; Davis et al., 1973; Fee et al., 1997; Schneider et al., 2014; Sommer and  
3 Wurtz, 2002; Yang et al., 2008). Neural recordings of the CD signal itself, however, have  
4 mostly been performed in non-mammalian species, including crickets, sea slugs, crayfish,  
5 tadpoles, and electric fish (Evans et al., 2003; Kirk and Wine, 1984; Li et al., 2004; Poulet  
6 and Hedwig, 2006; Requarth and Sawtell, 2014). The relatively small and simple nervous  
7 systems of these species have allowed for the isolation of neurons that carry or receive  
8 CD signals and identify their relationship to behavior. In contrast, CD signals have thus far  
9 only been recorded in the mediodorsal thalamus of non-human primates during eye  
10 movements (Sommer and Wurtz, 2004) and the auditory cortex of mice (Schneider et al.,  
11 2014).

12 The current findings provide the first direct neurophysiological evidence of CD in a  
13 developing mammal. Moreover, this is the first direct evidence of CD in the IO and LRN,  
14 consistent with what has been proposed for these two structures (Alstermark and Ekerot,  
15 2013; Arshavsky et al., 1978; De Zeeuw et al., 1998; Devor, 2002). Also, with this  
16 discovery of a unique neural CD signature—comprising a short-latency onset and sharp  
17 activity peak—we have a clear template to guide future neurophysiological investigations  
18 of CD signals in other species and neural systems across the lifespan.

19

## 20 **A neural mechanism for sharpening the CD signal**

21 As mentioned above, one of the signature features of the twitch-related CD signal is the  
22 sharp peak. This is surprising because, as shown here and in a previous study (Del Rio-  
23 Bermudez et al., 2015), twitch-related motor activity in MDJ neurons exhibits broad peaks



1 (see Figure 5F). How does a broad presynaptic signal in the MDJ get converted into a  
2 sharp postsynaptic response in the IO and LRN (see Figures 2C, 3G)? To answer this  
3 question, we focused on the IO because, compared with the LRN, a much higher  
4 proportion of its neurons exhibited sharp peaks.

5 There are a few possible candidate mechanisms. For example, in cortical pyramidal  
6 neurons, interactions between excitatory and inhibitory inputs can sharpen a neuron's  
7 activity profile (Kremkow et al., 2010). A similar mechanism is unlikely to operate in the IO  
8 for several reasons. First, inhibitory interneurons are sparse in that structure (<0.1%;  
9 Nelson and Mugnaini, 1988). Second, although the IO receives its predominant inhibitory  
10 input from the deep cerebellar nuclei (DCN; de Zeeuw et al., 1988), DCN activity occurs  
11 ~40 ms after a twitch (Del Rio-Bermudez et al., 2016). Moreover, in pilot experiments, we  
12 found that pharmacological inactivation of the DCN had no effect on IO activity at P8,  
13 consistent with a previously published report (Nicholson and Freeman, 2003).

14 Consequently, we hypothesized that inhibition in the IO is mediated by SK channels.  
15 In the IO of adult rats, these channels prevent summation of excitatory inputs (Garden et  
16 al., 2017). Here, using pharmacological inactivation, we demonstrate that SK channels are  
17 responsible for sharpening the olivary CD signal. A similar mechanism could be functional  
18 in the LRN as SK channels are also expressed in that structure in adult rats (Xu et al.,  
19 2013).

20

## 21 **Differential actions of CD signals at precerebellar nuclei**

22 In a previous study (Tiriac and Blumberg, 2016), it was demonstrated that wake-related  
23 reafference is blocked within the ECN, an effect that we attributed to modulation by a

1 wake-related CD signal. That CD-mediated blockade was lifted during twitching, thereby  
2 allowing twitch-related reafference to be conveyed to downstream motor structures,  
3 including the cerebellum. In contrast, focusing here on the IO and LRN, we found that the  
4 twitch-related CD signals themselves—not reafference—are conveyed to the cerebellum  
5 (Figure 7A). Therefore, within this broader context, we see that CD accompanies sleep  
6 and wake behavior in infants, but its effects are not monolithic: It can modulate the action  
7 of a comparator to gate reafference (as in the ECN) or be transmitted sequentially to  
8 multiple downstream structures (as in the IO or LRN → cerebellum). Such diverse effects  
9 of CD have been described elsewhere (Crapse and Sommer, 2008).

10 Although the three precerebellar nuclei—IO, LRN, and ECN—process CD and  
11 reafference differently, the common denominator of all this activity is the inundation of the  
12 developing cerebellum with twitch-related information (Figure 7A). In contrast, wake-  
13 related activity has been shown to be blocked at the level of the ECN (Tiriac and Blumberg,  
14 2016), thereby accounting in part for the relatively low levels of activity in the cerebellum  
15 at this age (Sokoloff et al., 2015a; Sokoloff et al., 2015b). In addition, we found here that  
16 the IO and LRN are also considerably less active during periods of wake. Although wake  
17 movements were occasionally accompanied by bursts of IO and LRN activity, this activity  
18 was much less pronounced than that observed at the onset of twitching. These weaker  
19 activation patterns could simply be due to the fact that wake movements, compared to  
20 twitches, are fewer in number at this age. For example, for a typical limb muscle in a P8  
21 rat over a 30-min period, we find that there are ~300 twitches but only ~30 wake  
22 movements. Consequently, when compared with twitches, there are many fewer

1 opportunities for wake movements to activate downstream cerebellar structures (Figure  
2 7B).

3

#### 4 **Functional implications of CD and reafference**

5 The developing sensorimotor system receives substantial sensory input from self-  
6 generated twitches and from external stimulation arising from the mother and littermates.  
7 It has been suggested that the infant brain does not distinguish between these two sources  
8 of input and that twitch-related reafference serves merely as a “proxy” for exafferent  
9 stimulation (Akhmetshina et al., 2016; McVea et al., 2016). This suggestion rests in part  
10 on the observation that both forms of stimulation, despite their very different origins, trigger  
11 similar patterns of cortical activity (Akhmetshina et al., 2016; Tiriac et al., 2012; Yang et  
12 al., 2013). Thus, with our finding that CD accompanies the production of twitches, it is now  
13 clear that there exists a mechanism with which the infant brain can distinguish self-  
14 generated from other-generated movements; the ability to make this distinction is thought  
15 to rely in part on the cerebellum (Blakemore et al., 2000; Wolpert et al., 1998).

16 There are a number of ways in which twitch-related CD could contribute to cerebellar  
17 development and function. For example, in the adult cerebellum, CD and reafference are  
18 known to converge via climbing and mossy fibers (Blakemore et al., 2001; Huang et al.,  
19 2013; van Kan et al., 1993; Wolpert et al., 1998). In this way, it is thought that the  
20 cerebellum instantiates a forward model that receives sensory predictions and computes  
21 prediction errors (by comparing CD with reafference) in order to facilitate motor learning  
22 (Blakemore et al., 2000; Brooks et al., 2015; Requarth and Sawtell, 2014; Wolpert et al.,  
23 1998).

1 Twitches could contribute to the process by which forward models are instantiated and  
2 updated, especially in the context of a rapidly growing body. To appreciate this possibility,  
3 consider this description of cerebellar function: “After much trial and error during infancy  
4 and throughout life, the cerebellum learns to associate actual movements with intended  
5 movements. Many of our motor memories are movements that we have repeated millions  
6 or billions of times...” (p. 538, Mason, 2011). In that context, the millions of twitches  
7 produced in early infancy could be a critical source of repeated convergent input to the  
8 developing cerebellum. This convergence, illustrated in Figure 7, would provide the  
9 developing cerebellum with abundant opportunities to align prediction and feedback  
10 signals in a topographically organized fashion.

11 Cerebellar circuitry undergoes substantial development over the first three postnatal  
12 weeks in rats (Altman, 1972a; b; c; Shimono et al., 1976; Wang and Zoghbi, 2001). Many  
13 of these developmental processes depend heavily on neural activity, including climbing  
14 fiber synapse elimination and translocation at Purkinje cells (Andjus et al., 2003; Kakizawa  
15 et al., 2000; Kano and Hashimoto, 2012; Watanabe and Kano, 2011). With respect to  
16 synapse elimination, beginning around P8, the initial multiple innervation of Purkinje cells  
17 by climbing fibers begins to shift toward singly innervated cells in the second postnatal  
18 week as one climbing fiber is selectively strengthened over others. Importantly, spike  
19 timing-dependent plasticity (STDP) has been implicated in this process (Kawamura et al.,  
20 2013); STDP depends on the repetitive and sequential firing of pre- and post-synaptic cells  
21 within a short and precise time window (Feldman, 2012; Kawamura et al., 2013; Sgritta et  
22 al., 2017). The present findings in precerebellar nuclei, in which twitch-related CD reliably  
23 preceded reafference by approximately 10-30 ms, are consistent with twitches playing a

1 role in cerebellar development via STDP. Moreover, recording from Purkinje cells at P8,  
2 we previously found that complex and simple spikes were highly likely to occur within 0-  
3 50 ms after twitches (Sokoloff et al., 2015a).

4

## 5 **Implications for neurodevelopmental disorders**

6 Disruption of cerebellar function during sensitive periods of development can have  
7 negative cascading effects on cerebello-cortical communication and ultimately on  
8 associated sensorimotor and cognitive processes, as observed in autism spectrum  
9 disorder (Diamond, 2000; Wang et al., 2014). There are many potential causes of early  
10 cerebellar dysfunction, including prenatal and postnatal exposure to environmental  
11 stressors (Wang et al., 2014). One such stressor could be sleep deprivation or restriction,  
12 especially during early infancy when sleep is the predominant state (Jouvet-Mounier et al.,  
13 1970; Roffwarg et al., 1966). As demonstrated here and in previous studies (Sokoloff et  
14 al., 2015a; Sokoloff et al., 2015b), AS provides an important context for cerebellar activity  
15 in early development. Therefore, perturbation of sleep could deprive the cerebellum and  
16 other structures of critical sensorimotor activity during sensitive periods of development.

17 Accumulating evidence also suggests that CD-related processing is dysfunctional in  
18 patients with schizophrenia. Specifically, failure to disambiguate “self-generated” from  
19 “other-generated” sensory input may underlie hallucinations and delusions of control  
20 (Feinberg and Guazzelli, 1999; Ford et al., 2008). If twitches help to instruct the developing  
21 brain to distinguish self from other, disruption of sleep and sleep-related sensorimotor  
22 processing may have later-emerging negative consequences for the processing of CD.

23

## 1 **Conclusion**

2 It has been argued that the discreteness of twitches makes them ideally suited to provide  
3 high-fidelity sensory information at ages when activity-dependent development is so  
4 important for the developing nervous system (Blumberg et al., 2013; Tiriach et al., 2015).  
5 The present results go further to suggest that the convergence of twitch-related CD and  
6 reafference associated with millions of twitches over the early developmental period  
7 provides ample opportunity for assimilating growing limbs into the infant's emerging body  
8 schema (Blumberg and Dooley, 2017).

9

## 10 **MATERIALS AND METHODS**

11 All experiments were carried out in accordance with the National Institutes of Health Guide  
12 for the Care and Use of Laboratory animals (NIH Publication No. 80-23). Experiments  
13 were also approved by the Institutional Animal Care and Use Committee (IACUC) of the  
14 University of Iowa.

15

### 16 **Subjects**

17 Male and female Sprague-Dawley Norway rats (*Rattus norvegicus*) at postnatal day (P) 7-  
18 9 (hereafter P8; n=68) from 60 litters were used for the study. All litters were culled to eight  
19 pups by P3. Mothers and litters were housed and raised in standard laboratory cages (48  
20 x 20 x 26 cm). Food and water were available ad libitum. The animals were maintained on  
21 a 12-h light-dark cycle with lights on at 0700 h. Littermates were never assigned to the  
22 same experimental group.

1

## 2 **Surgery**

3 A pup with a visible milk band was removed from the home cage. Under isoflurane (3-5%)  
4 anesthesia, bipolar hook electrodes (50  $\mu$ m diameter, California Fine Wire, Grover Beach,  
5 CA) were inserted into the nuchal, forelimb, and hindlimb muscles for electromyography  
6 (EMG) and secured with collodion. A stainless steel ground wire was secured transdermally  
7 on the back. A custom-built head-fix device was then secured to the exposed skull with  
8 cyanoacrylate adhesive (Blumberg et al., 2015). The local anesthetic, Bupivacaine (0.25%)  
9 was applied topically to the site of incision and some subjects were also injected  
10 subcutaneously with the analgesic agent carprofen (0.005 mg/g). The pup was lightly  
11 wrapped in gauze and allowed to recover in a humidified, temperature-controlled (35 °C)  
12 incubator for at least one hour. After recovery, the pup was briefly (<15 min) re-anesthetized  
13 with isoflurane (2-3%) and secured in a stereotaxic apparatus. A hole was drilled in the  
14 skull for insertion of the recording electrode into the inferior olive (IO; coordinates: AP=3.4-  
15 3.6 mm caudal to lambda; ML=0-1.2 mm), the lateral reticular nucleus (LRN; coordinates:  
16 AP=3.5-3.7 mm caudal to lambda; ML=1.5-1.8 mm), or midbrain nuclei near the red nucleus  
17 (RN) within the mesodiencephalic junction (MDJ; coordinates: AP=4.7-4.9 mm caudal to  
18 bregma; ML=0.2-0.5 mm). Two additional holes were drilled over the frontal or parietal  
19 cortices for subsequent insertion of the ground wire and a thermocouple (Omega  
20 Engineering, Stamford, CT) to measure brain temperature. In 15 pups in which no  
21 neurophysiological recordings were performed, only one additional hole was drilled for  
22 insertion of the thermocouple. After surgery, the pup was transferred to the recording  
23 chamber.

1

## 2 **Electrophysiological recordings**

3 The head-fix device was secured to the stereotaxic apparatus housed within the recording  
4 chamber and the pup was positioned with its body prone on a narrow platform with limbs  
5 dangling freely on both sides (Blumberg et al., 2015). Care was taken to regulate air  
6 temperature and humidity such that the pup's brain temperature was maintained at 36-37  
7 °C. Adequate time (1-2 h) was allowed for the pup to acclimate to the recording  
8 environment and testing began only when it started cycling normally between sleep and  
9 wake. Pups rarely exhibited abnormal behavior or any signs of discomfort or distress;  
10 when they did, the experiment was terminated. The bipolar EMG electrodes were  
11 connected to a differential amplifier (A-M Systems, Carlsborg, WA; amplification: 10,000x;  
12 filter setting: 300-5000 Hz). A ground wire (Ag/AgCl, 0.25 mm diameter, Medwire, Mt.  
13 Vernon, NY) was inserted into the frontal or parietal cortex contralateral to the recording  
14 site and a thermocouple was inserted into the frontal or parietal cortex ipsilateral to the  
15 recording site. Neurophysiological recordings were performed using a 16-channel silicon  
16 electrode or a 4-channel linear probe (A1x16-10mm-100-177; A1x16-8mm-100-177;  
17 Q1x4-10mm-50-177, NeuroNexus, Ann Arbor, MI), connected to a data acquisition system  
18 (Tucker-Davis Technologies, Alachua, FL) that amplified (10,000x) and filtered (500-5000  
19 Hz) the neural signals. A digital interface and Spike2 software (Cambridge Electronic  
20 Design, Cambridge, UK) were used to acquire EMG and neurophysiological signals at 1  
21 kHz and at least 12.5 kHz, respectively.

22 A micromanipulator (FHC, Bowdoinham, ME) was used to lower the electrode into the  
23 brain (DV; IO: 5.5-6.2 mm, LRN: 5-5.8 mm, midbrain structures: 4.5-4.9 mm) until action



1 potentials were detected. Recording began at least 10 min after multiunit activity (MUA)  
2 was detected. Before insertion, the electrode was dipped in fluorescent Dil (Life  
3 Technologies, Grand Island, NY) for later identification of the recording sites. Recording  
4 of MUA and EMG activity continued for 30 min as the pup cycled freely between sleep and  
5 wake (in two pups, activity was recorded for only 15 min). The experimenter, blind to the  
6 electrophysiological record, scored the pup's sleep and wake behaviors, as described  
7 previously (Karlsson et al., 2005).

8 At the end of the recording session, the experimenter assessed evoked neural  
9 responses to exafferent stimulation of the limbs. Forelimbs and hindlimbs were gently  
10 stimulated using a paint brush. When evoked responses were observed in at least one of  
11 the recording channels, stimulation was repeated 20-30 times at intervals of at least 5 s.  
12 Each stimulus event was marked using a key press.

13

## 14 **Histology**

15 At the end of all recording sessions, pups were anesthetized with sodium pentobarbital  
16 (1.5 mg/g IP) or ketamine/xylazine (0.02 mg/g IP) and perfused transcardially with  
17 phosphate-buffered saline and 4% formaldehyde. Brains were sectioned coronally at 80  
18  $\mu\text{m}$  using a freezing microtome (Leica Microsystems, Buffalo Grove, IL). Recording sites  
19 were determined by examining Dil tracks, before and after staining with cresyl violet, using  
20 a fluorescent microscope (Leica Microsystems, Buffalo Grove, IL).

21

## 22 **Retrograde tracing**

23 Retrograde tracing was performed at P8 (n=9) using wheat germ agglutinin (WGA)

1 conjugated to Alexa Fluor 555 or 488 (Invitrogen Life Technologies, Carlsbad, CA). WGA-  
2 555 was injected into the IO in 3 pups and into the LRN in 2 pups. In the remaining 2 pups,  
3 dual tracing was performed by injecting WGA-488 into the IO and WGA-555 into the LRN.  
4 To perform these injections, a pup was anesthetized with 2-5% isoflurane and secured in  
5 a stereotaxic apparatus. A 0.5  $\mu$ l microsyringe (Hamilton, Reno, NV) was lowered  
6 stereotaxically into the IO or LRN and 0.01-0.02  $\mu$ l of 2% WGA-555 or WGA-488 (dissolved  
7 in 0.9% saline) was injected over 1 min. After a 15-min post-infusion period, the  
8 microsyringe was withdrawn and the incision was closed using Vetbond (3M, Maplewood,  
9 MN). The pup was returned to its home cage and perfused 24 h later as described above.  
10 Brains were sectioned coronally at 50  $\mu$ m. Every other section was kept for Nissl staining  
11 for verification of the injection sites and areas that show retrograde labeling. Retrogradely  
12 labeled cell bodies were imaged using a fluorescent microscope (DFC300FX, Leica, Buffalo  
13 Grove, IL)

14

## 15 **Stimulation of MDJ structures**

16 In urethanized (1.5 mg/g) head-fixed P8 rats (n=8), a parylene-coated tungsten stimulating  
17 electrode (World Precision Instruments, Inc., Sarasota, FL) was lowered into the MDJ  
18 nuclei most strongly implicated by retrograde tracing. The nuclei were electrically  
19 stimulated to produce discrete movements of the forelimbs and/or hindlimbs. Trains of  
20 pulses (pulse duration: 0.2-0.4 ms; pulse frequency: 300 Hz; train width: 45 ms; Williams  
21 et al., 2014) were delivered every 5 s for 60 min. The current was adjusted (300-900  $\mu$ A)  
22 as needed to ensure that stimulation continued to reliably produce movement. Ninety min

1 after the last stimulation, the pup was sacrificed and the brain was prepared for c-Fos  
2 immunohistochemistry.

3

#### 4 **Immunohistochemistry for c-Fos expression**

5 Brains were sliced in 50  $\mu$ m sections and every other section was kept for Nissl staining  
6 for verification of the stimulation sites and visualization of c-Fos expression, respectively.  
7 Primary antibody against c-Fos (anti-c-Fos rabbit polyclonal IgG; Santa Cruz  
8 Biotechnology) was diluted 1:1000 in a universal blocking serum (2% bovine serum  
9 albumin; 1% triton; 0.02% sodium azide) and applied to the sections. Sections were  
10 coverslipped and left to incubate for 48 h at 4°C. After incubation of the primary antibody  
11 and a series of washes in PBS, a secondary antibody (Alexa Fluor 488 donkey anti-rabbit  
12 IgG; Life Technologies, Grand Island, NY; 1:500 in PBS) was applied to the section and  
13 incubate for 90 min at room temperature. The slides were coverslipped using Fluoro-Gel  
14 (Electron Microscopy Sciences (Hatfield, PA) and expression of c-Fos was examined  
15 using a fluorescent microscope (DFC300FX or DM6B, Leica, Buffalo Grove, IL).

16

#### 17 **Intra-IO injection of apamin**

18 In 18 P8 rats, pups were prepared for electrophysiological recording as described above  
19 and transferred to the recording rig. Once a pup started cycling between sleep and wake,  
20 a 0.5  $\mu$ l microsyringe was lowered stereotaxically into the IO and 100 nl of apamin.  
21 (Abcam, Cambridge, MA; 1  $\mu$ M, dissolved in 0.9% saline, n=8) or saline (n=10) was  
22 injected over 1 min. During preparation of the drug or vehicle, fluorogold (4%,  
23 Fluorochrome, Denver, CO) was added to the solutions for subsequent assessment of the

1 extent of drug diffusion. After a 15-min period to allow for diffusion, the microsyringe was  
2 withdrawn and a recording electrode was lowered in its place into the IO and activity was  
3 recorded for 30 min. At the end of the experiment, the pup was sacrificed and its brain was  
4 prepared for histology as described above.

5

## 6 **Data analysis**

7 *Spike sorting.* As described previously (Mukherjee et al., 2017; Sokoloff et al., 2015a),  
8 action potentials (signal-to-noise  $\geq 2:1$ ) were sorted from MUA records using template  
9 matching and principal component analysis in Spike2 (Cambridge Electronic Design).  
10 Waveforms exceeding 3.5 SD from the mean of a given template were excluded from  
11 analysis.

12 *Identification of behavioral states.* EMG activity and behavioral scoring were used to  
13 identify behavioral state (Blumberg et al., 2015). To establish an EMG threshold for  
14 distinguishing sleep from wake, EMG signals were rectified and smoothed ( $\tau = 0.001$  s).  
15 The mean amplitude of high muscle tone and atonia were calculated from five  
16 representative 1-s segments and the midpoint between the two was used to establish the  
17 threshold for defining periods of wake (defined as muscle tone being above the threshold  
18 for at least 1 s) and sleep (defined as muscle tone being below the threshold for at least 1  
19 s). Active wake (AW) was identified by high-amplitude limb movements (e.g., stepping,  
20 stretching) against a background of high muscle tone and was confirmed using behavioral  
21 scoring. The onset of a wake movement was defined on the basis of EMG amplitude  
22 surpassing the established threshold. Active sleep (AS) was characterized by the  
23 presence of myoclonic twitches of the limbs against a background of muscle atonia.

1 Twitches were identified as sharp EMG events that exceeded by  $\geq 3x$  the mean EMG  
2 baseline during atonia; twitches were also confirmed by behavioral scoring (Seelke and  
3 Blumberg, 2010). Additionally, behavioral quiescence (BQ) was characterized as periods  
4 of low muscle tone interposed between AW and AS.

5 *State-dependent neural activity.* For each unit, average firing rate across all behavioral  
6 states was determined. Bouts of AS, AW, and BQ were excluded when firing rates  
7 exceeded 3 SD of the firing rate for that behavioral state; this happened rarely (0-2 per  
8 unit). Next, pairwise comparison of firing rates across states was performed using the  
9 Wilcoxon matched-pairs signed-ranks test (SPSS; IBM, Armonk, NY). Units were  
10 categorized as AS-on ( $AS > AW \geq BQ$ ), AW-on ( $AW > AS \geq BQ$ ), AS+AW-on ( $AS = AW >$   
11  $BQ$ ) or state-independent ( $AS = AW = BQ$ ). Firing rates of all AS-on units across behavioral  
12 states were further compared using the Wilcoxon matched-pairs signed-ranks test.

13 *Twitch-triggered neural activity.* To determine the relationship between unit activity and  
14 twitching, we triggered unit activity on twitch onsets and generated perievent histograms  
15 over a 1-s window using 5- or 10-ms bins. We performed these analyses on each individual  
16 unit using twitches from nuchal, forelimb, and hindlimb muscles. We tested statistical  
17 significance by jittering twitch events 1000 times over a 500-ms window using PatternJitter  
18 (Amarasingham et al., 2012; Harrison and Geman, 2009). Then using a custom-written  
19 Matlab program (MathWorks, Natick, MA), we generated upper and lower confidence  
20 bands ( $p < 0.05$  or  $0.01$  for each confidence band) using a method that corrects for multiple  
21 comparisons (Amarasingham et al., 2012). For each unit, after histograms were separately  
22 constructed for nuchal, forelimb, or hindlimb twitches, we identified and activity that was  
23 significant in response to a twitch. When more than one muscle yielded a significant

1 change in neural activity, we further analyzed the data only for the muscle that showed the  
2 strongest relationship (determined by the highest firing rate) between twitches and unit  
3 activity. We then pooled these data to create perievent histograms composed of significant  
4 units and performed jitter analyses on the pooled data.

5 *Wake-triggered neural activity.* To determine the relationship between neural activity  
6 and wake movements, we triggered unit activity on wake-movement onset and created  
7 perievent histograms on the pooled data (20-ms bins, 1-s window). We then performed  
8 jitter analysis as described above.

9 *Evoked response to exafferent stimulation.* We identified MUA in which evoked  
10 responses were observed and then sorted the units. Those units were then pooled and  
11 triggered on stimulus onset (determined using EMG artifact) to create perievent  
12 histograms. The jitter analysis was performed on the pooled data, as described above.

13 *Intra-olivary injection of apamin.* First, we identified if apamin affected sleep-wake  
14 behavior. We assessed the amount of time spent in AS and the number of twitches per  
15 min of AS in each pup. Differences across groups were tested using the Mann-Whitney  $U$   
16 test. Next, we determined if apamin altered the overall firing rate. We calculated the firing  
17 rate of each unit during AS and compared that across groups using the Mann-Whitney  $U$   
18 test. One value exceeding 3 SD was excluded as an outlier.

19 We then assessed whether apamin altered the shape of twitch-triggered perievent  
20 histogram. First, we created perievent histograms (10-ms bins, 1-s window) for each unit  
21 as described above. For each unit, firing rate was normalized to the peak firing rate and  
22 the average normalized firing rate across all units in each group was calculated. Perievent  
23 histograms were then created with the average (+SEM) normalized firing rates triggered

1 on twitches for each group. Next, we assessed how apamin altered the pattern of twitch-  
2 triggered activity of individual units. To do that, we identified significant units by performing  
3 jitter analysis on individual units as described above. We counted the percentage of units  
4 that showed precise peak within  $\pm 10$  ms around a twitch and compared that across groups  
5 using a Chi-squared test. Finally, we pooled significant units in each group and pooled  
6 them to create perievent histograms consisting of significant units only. To assess the  
7 difference in the shape of perievent histograms, we calculated the area under the curve  
8 by adding the histogram counts within a particular time window and compared that across  
9 groups using the Mann-Whitney  $U$  test. One value exceeding 3 SD was excluded as an  
10 outlier.

11 Unless otherwise stated, alpha was set at 0.05.

## FIGURES AND LEGENDS

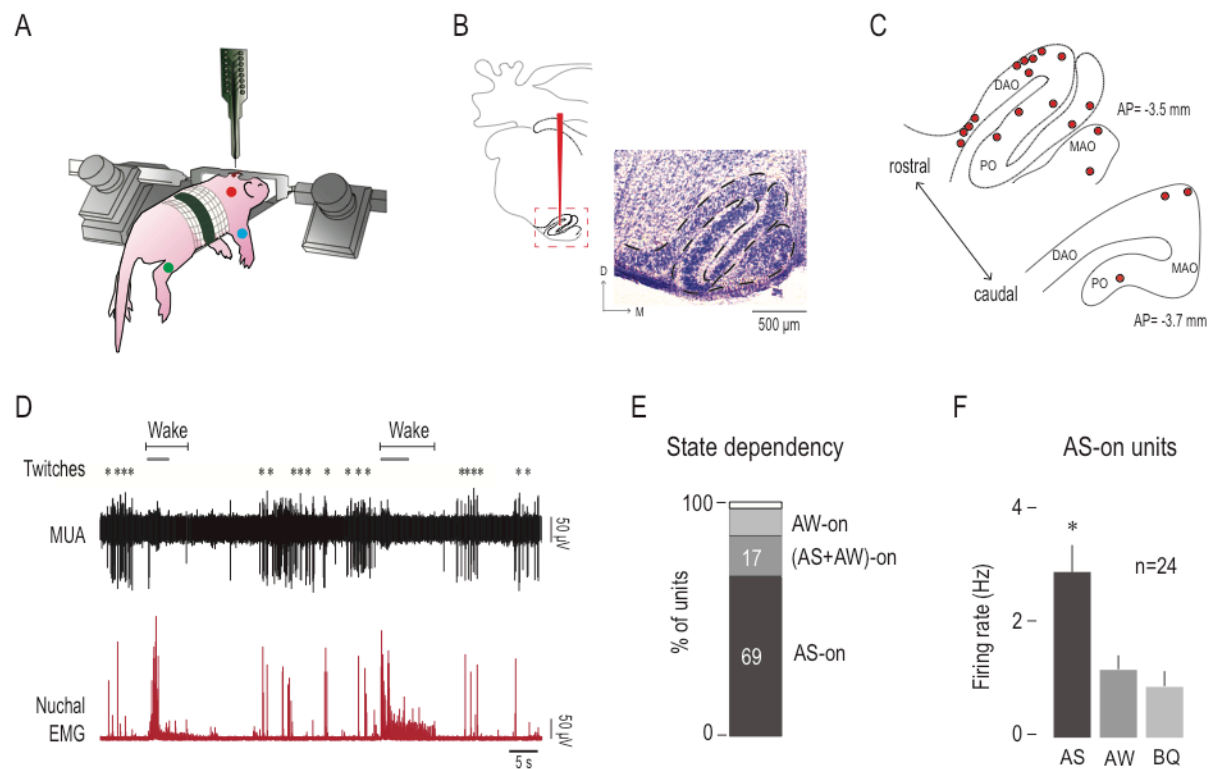



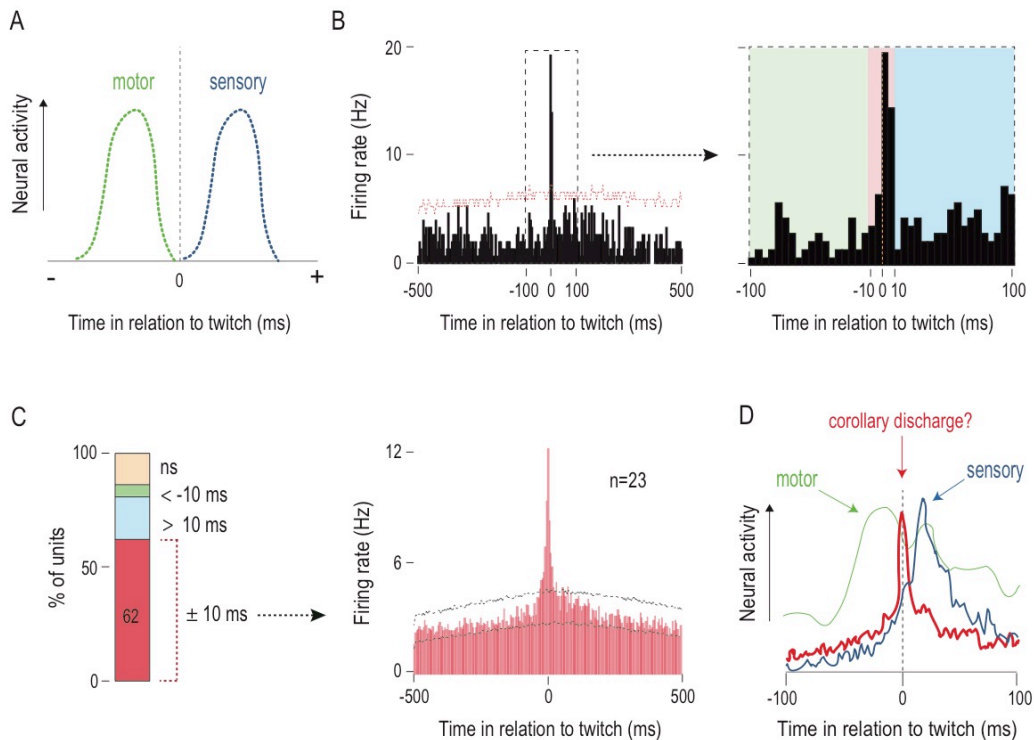

**Figure 2 and 1 supplement. Twiches trigger sharp, short-latency olivary activity. (A)** Perievent histograms for idealized motor and sensory units in relation to twitch onset. Motor activity precedes the onset of twiches (green line) and reafference follows the onset of twiches (blue line). Black vertical line denotes twitch onset. **(B)** Left: Perievent histogram (5-ms bins) showing sharp, short-latency activity of a representative IO unit in relation to nuchal muscle twiches. Upper confidence band ( $p < 0.01$  for each band) is indicated by red horizontal dashed line (lower confidence band is at zero). Black dashed box demarcates the  $\pm 100$ -ms time window around twiches. Right: The  $\pm 100$ -ms time window around twiches at left is shown. Green, red, and blue shaded areas denote  $< -10$ -ms,  $\pm 10$ -ms, and  $> 10$ -ms time windows, respectively. **(C)** Left: Stacked plot showing the percentage of IO units that exhibited significant increases in firing within  $\pm 10$ -ms (red),  $> 10$ -ms (blue), and  $< -10$ -ms (green) time windows around twiches. Right: Perievent histogram showing IO unit activity in relation to twiches for those units that were significantly active in the  $\pm 10$ -ms time window. Data are pooled across 23 units and triggered on 6,602 twiches. Upper and lower confidence bands ( $p < 0.01$  for each band) are indicated by black and gray horizontal dashed lines, respectively. **(D)** Comparison of IO activity in relation to twiches (red; from C) with that of a representative motor (green line; data from Del Rio-Bermudez et al., 2015) and sensory (blue line; data from Tiriac and Blumberg, 2016) structure. Black vertical dashed line denotes twitch-onset.

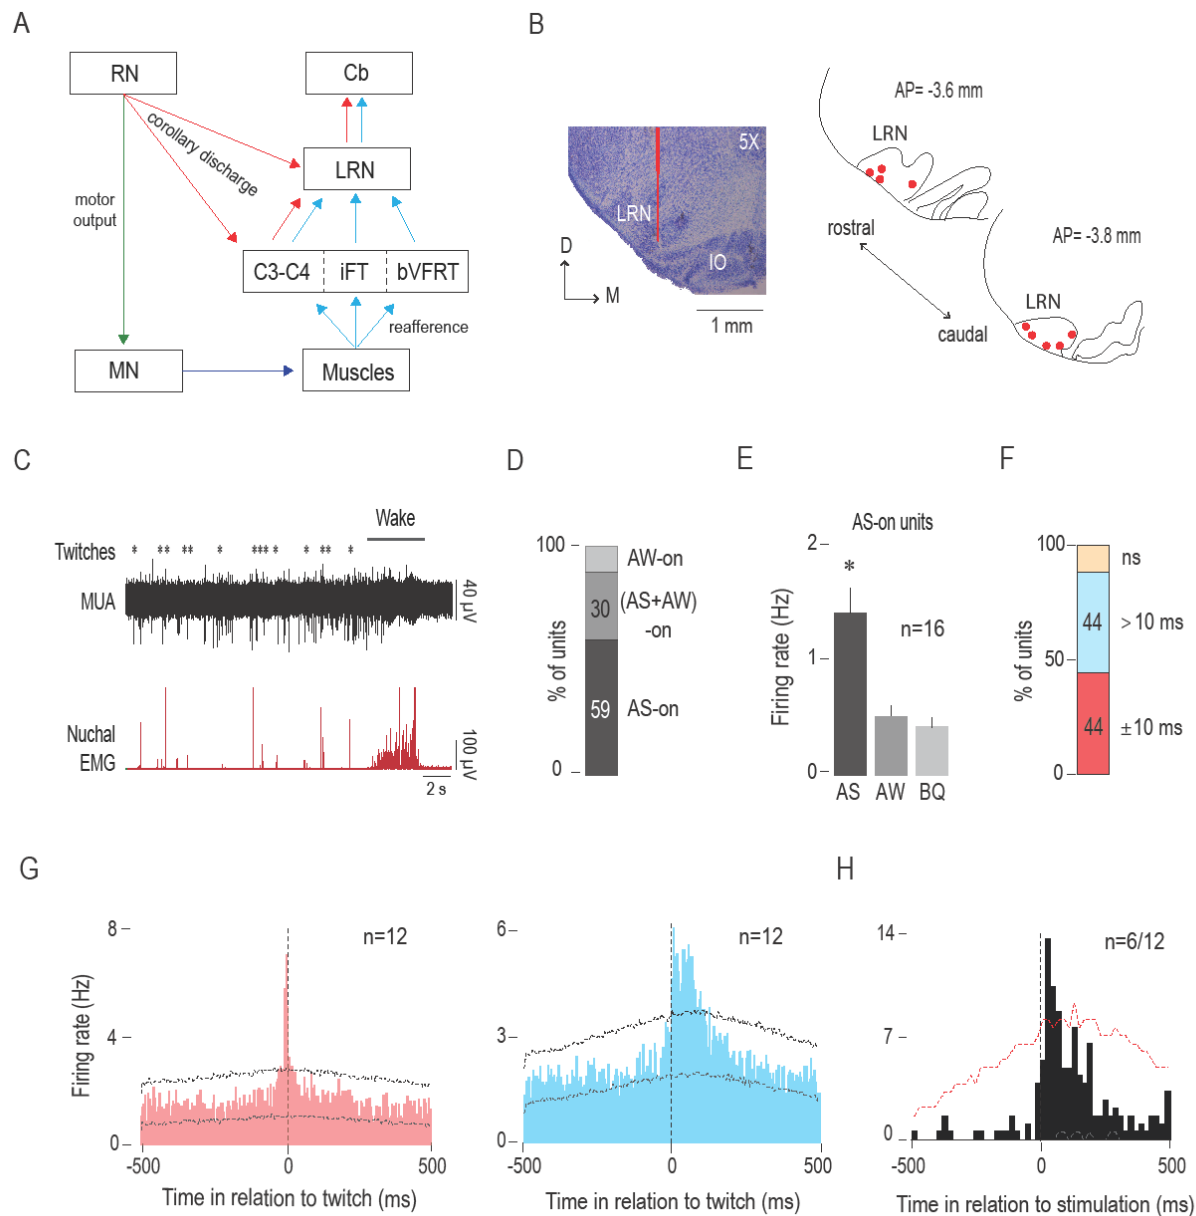

**Figure 3. The LRN receives twitch-related corollary discharge and refference signals.** (A) Diagram depicting afferent and efferent connections of the LRN. Pathways conveying motor commands (green), refference (blue), and corollary discharge (red) are shown (see Alstermark and Ekerot, 2013). (B) Left: Coronal section (5x) stained with cresyl violet depicting the anatomical location of the LRN in the brainstem and reconstruction of a representative electrode placement (red vertical line) in the LRN. Right: Reconstruction of electrode placements (red circles) within the LRN in two coronal sections across all P8 subjects (n=9). (C) Representative recording of rectified nuchal EMG activity and multiunit activity (MUA) in the LRN during spontaneous sleep-wake cycling. Asterisks denote twitches and gray horizontal bars denote wake movements as scored by the experimenter.

(D) Stacked plot showing the percentage of AS-on, (AS+AW)-on, and AW-on units in the LRN. (E) Bar graphs showing mean (+SEM) firing rates of AS-on units across behavioral states. \* significant difference from AW and BQ,  $p < 0.0005$ . (F) Stacked plot depicting the percentage of units that significantly increased their firing rates  $\pm 10$  ms around twitches (red) and  $> 10$  ms following twitches (blue). (G) Perievent histograms (5-ms bins) showing LRN unit activity in relation to twitches. Left: Data pooled across 12 units (and triggered on 3,688 twitches) that significantly increased their activity in the  $\pm 10$ -ms time window (red). Right: Data pooled across the 12 units (and triggered on 5264 twitches) that exhibited a significant peak with a latency of  $> 10$  ms. Black vertical dashed lines indicate twitch onset. Upper and lower confidence bands ( $p < 0.01$  for each band) are indicated by black and green horizontal dashed lines, respectively. (H) Perievent histogram (20-ms bins) depicting LRN unit activity ( $n = 6$  of a possible total of 12) in response to forelimb or hindlimb stimulation for those units that significantly increased their activity in the  $> 10$  ms time window (blue histogram in G). Black vertical dashed line corresponds to stimulation onset determined using EMG activity. Upper confidence band ( $p < 0.05$ ) is indicated by red horizontal dashed line. RN: red nucleus; MN: motor neurons; C: cervical segment; LRN: lateral reticular nucleus; Cb: cerebellum; IO: inferior olive; D: dorsal; M: medial; AP: antero-posterior in relation to lambda; AS: active sleep; AW: active wake; BQ: behavioral quiescence; ns: not significant.

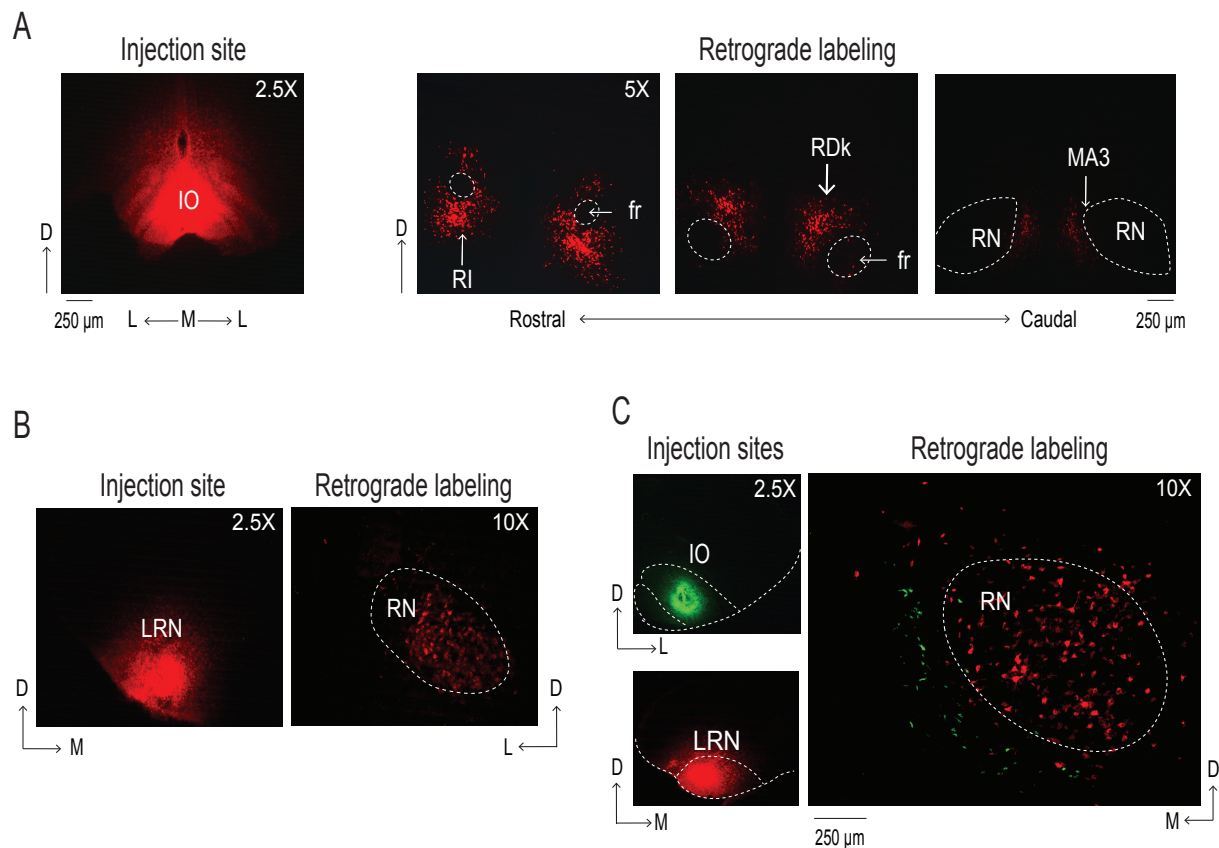

**Figure 4 and 1 supplement. Retrograde labeling of the mesodiencephalic junction (MDJ) after infusion of WGA into the IO and LRN of P8 rats. (A)** Left: Coronal section (2.5x) depicting WGA-555 diffusion in the IO. Right: Coronal sections (5x) depicting retrogradely labeled cell bodies in multiple MDJ nuclei. **(B)** Left: Coronal section (2.5x) depicting WGA-555 diffusion in the LRN. Right: Coronal section (10x) depicting retrogradely labeled cell bodies in the red nucleus (RN). **(C)** Left: Coronal sections (2.5x) depicting WGA-488 diffusion in the IO (top; green) and WGA-555 diffusion in the LRN (bottom; red) in the same P8 rat. Right: Coronal section (10x) depicting retrogradely labeled cell bodies in the RN (red; from LRN) and the region immediately medial to it (green; from IO). D: dorsal; L: lateral; M: medial; IO: inferior olive; RI: rostral interstitial nucleus of Cajal; fr: fasciculus retroflexus; RDK: rostral nucleus of Darkschewitsch; MA3: accessory oculomotor nuclei; LRN: lateral reticular nucleus.

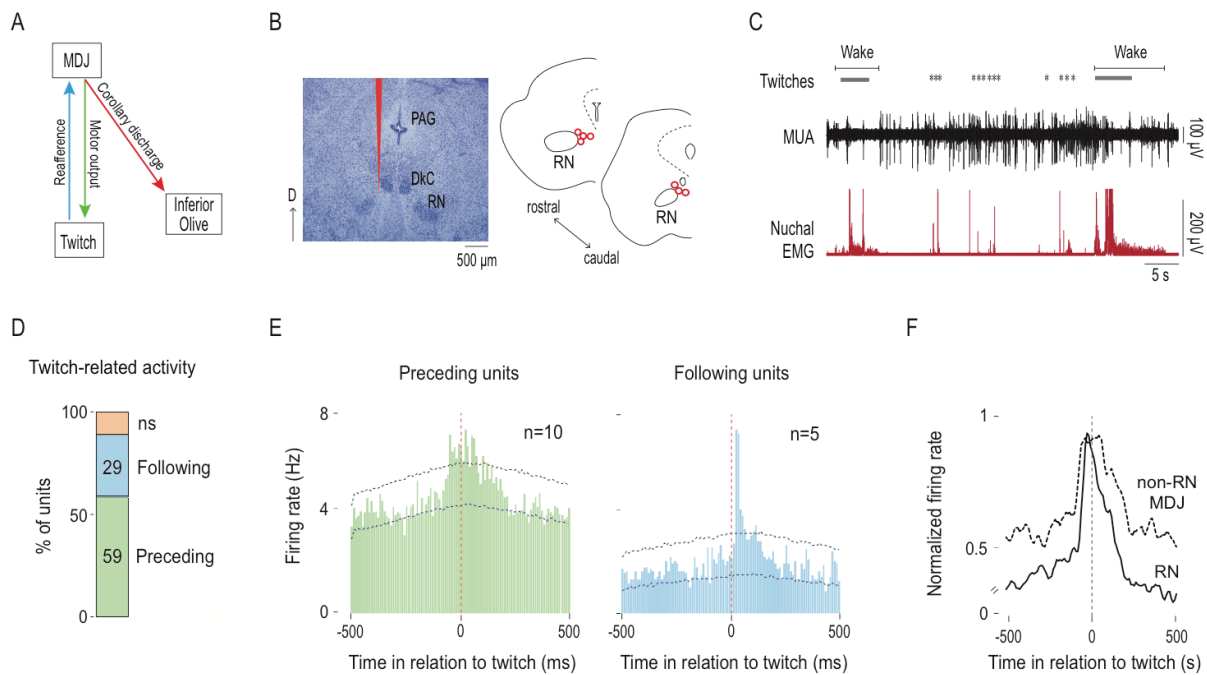

**Figure 5. MDJ structures adjacent to the red nucleus exhibit twitch-preceding and twitch-following activity.** (A) Diagram showing anatomical connections of the MDJ regions that lie adjacent to the red nucleus. Proposed pathways conveying motor commands (green line), reafference (blue line), and corollary discharge (red line) are shown. (B) Left: Reconstruction of a representative electrode placement (red vertical line; 2.5x). Right: Reconstruction of electrode placements (red circles) in the MDJ in two coronal sections across all pups (n=7). (C) Representative recording of rectified nuchal EMG activity and multiunit activity (MUA) in the MDJ during spontaneous sleep-wake cycling. Asterisks denote twitches and gray horizontal bars denote wake movements as scored by the experimenter. (D) Stacked plot depicting the percentage of twitch-preceding (motor; green) and twitch-following (sensory; blue) units in the MDJ. (E) Left: Perievent histogram (10-ms bins) showing activity of twitch-preceding MDJ units in relation to twitches. Data pooled across 10 units and triggered on 2877 twitches. Right: Perievent histograms (10-ms bins) showing activity of twitch-following MDJ units in relation to twitches. Data pooled across 5 units and triggered on 1382 twitches. Red vertical dashed lines correspond to twitch onset. Upper and lower confidence bands ( $p < 0.05$  for each band) are indicated by black and blue horizontal dashed lines, respectively. (F) Perievent histograms (10-ms bins) comparing normalized firing rate in relation to twitch onset for twitch-preceding units in the red nucleus (RN; black solid line; data from Del Rio-Bermudez et al., 2015) with that of non-RN MDJ units adjacent to the red nucleus (black dashed line; redrawn from E, left). Black vertical dashed lines correspond to twitch onsets. D: dorsal; PAG: periaqueductal gray; DkC: caudal nucleus of Darkschewitsch; ns: not significant.

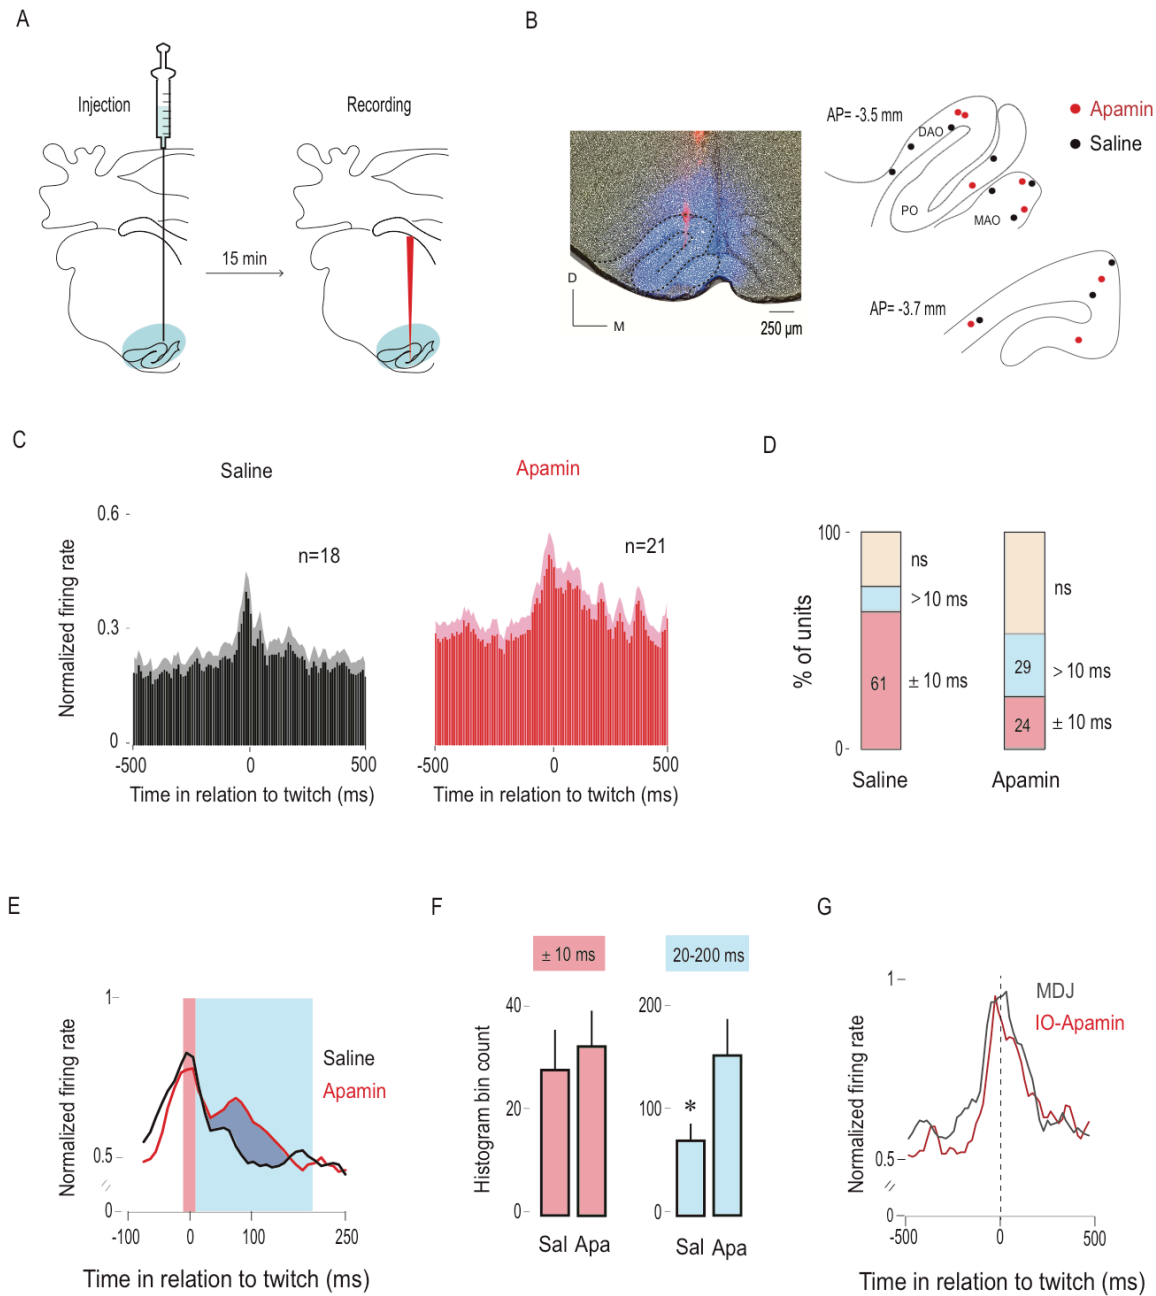

**Figure 6 and 1 supplement. Apamin broadens the twitch-related peak in the IO. (A)** Diagram depicting experimental design. Apamin or saline, mixed with 4% Fluorogold, was microinjected into the IO. Blue shaded area shows the extent of drug diffusion. Fifteen minutes after the injection, the microsyringe was withdrawn and a recording electrode, coated with Dil (red vertical line), was inserted into the IO. Unit activity was recorded for 30 min. **(B)** Left: Representative coronal section showing drug diffusion in the IO (blue shaded area) and placement of recording electrode (red) within the IO. Right: Reconstruction of electrode placements within the IO in two coronal sections for all pups

in the saline (black dots; n=10 pups) and apamin (red dots; n=8 pups) groups. **(C)** Perievent histograms (10-ms bins) showing mean (+SEM) normalized firing rate across all units triggered on twitches in the saline (n=18) and apamin (n=21) groups. **(D)** Stacked plots showing the percentage of units with significant activity within  $\pm 10$  ms around twitches (red) and  $>10$  ms following twitches (blue) in the saline and apamin groups. **(E)** Perievent histograms (10-ms bins) showing IO unit activity in relation to twitches in the saline (black line) and apamin (red line) groups. Data are pooled across significant units only (red + blue stacks in E) in both groups (n=13 in saline and n=11 in apamin group) and smoothed ( $\tau=10$  ms). Red shaded area denotes  $\pm 10$ -ms time window around twitches. Blue shaded area denotes 20-200-ms time window following twitches. **(F)** Bar graphs showing the area under the curve (mean + SEM) during two time windows: the  $\pm 10$ -ms window around twitches (red) and the 20-200-ms window following twitches (blue) for the units in the saline (n=12) and apamin (n=11) groups. \* p=0.03. **(G)** Perievent histograms comparing normalized firing rate in relation to twitch onset for twitch-preceding units in the non-RN MDJ (gray line, taken from Figure 5E) with that of IO units in the apamin group (red line). DAO: dorsal accessory olive; MAO: medial accessory olive; PO: principal olive; D: dorsal; M: medial; AP: antero-posterior in relation to bregma; sal: saline; apa: apamin; ns: not significant.

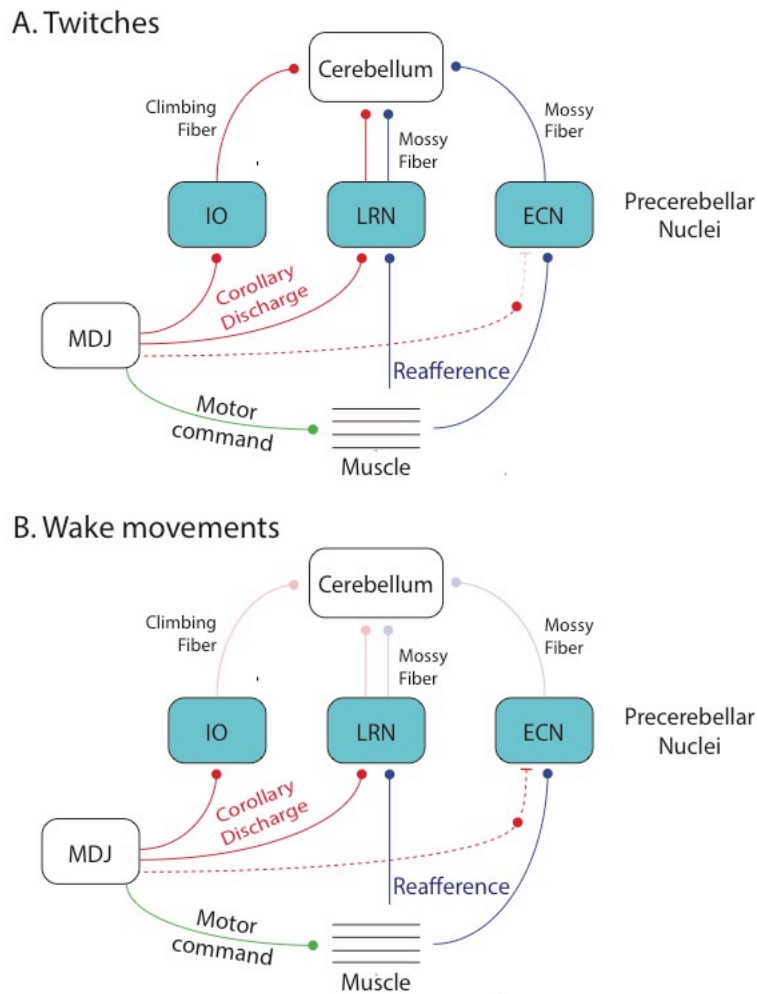

**Figure 7. Summary diagrams depicting flow of neural activity in the cerebellar system in association with twitches and wake movements in week-old rats. (A)** Flow of twitch-related CD from the MDJ to the IO and LRN and reafference from the limbs to the LRN and ECN. Both CD and reafference converge in the cerebellum via climbing and mossy fibers. Dotted lines denote hypothesized functional connections. **(B)** Activity is less pronounced or actively suppressed during wake movements in these three precerebellar nuclei, thereby reducing input to the cerebellum.



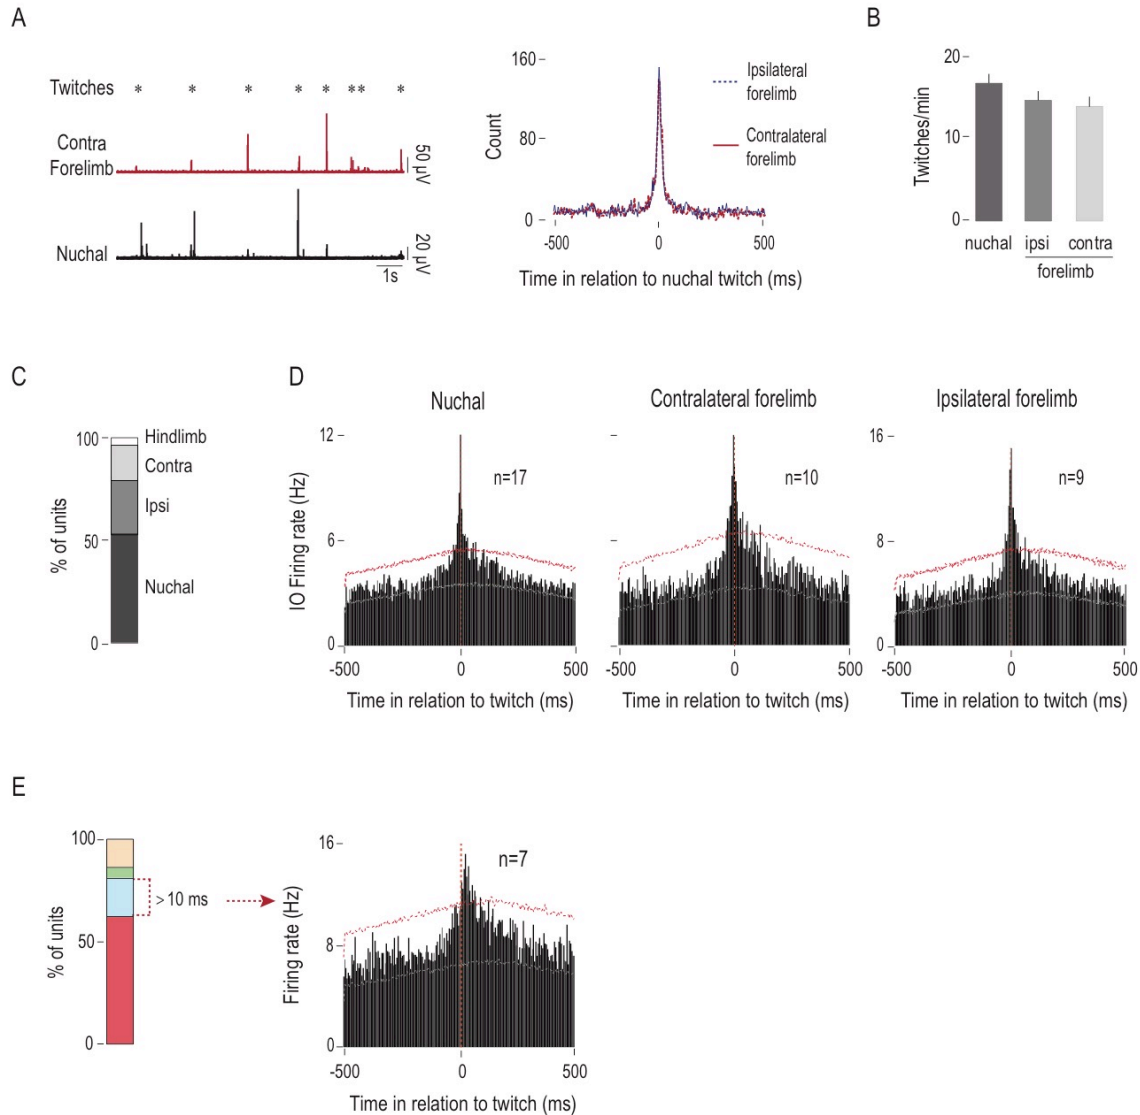

**Figure 2—figure supplement 1. IO units respond predominantly to nuchal and forelimb twitches.** (A) Left: Representative recording of nuchal and contralateral forelimb EMG activity showing co-occurrence of twitches in those muscles. Asterisks denote experimenter-scored twitches. Right: Cross-correlogram (5-ms window) depicting co-occurrence of nuchal muscle twitches with contralateral (red line) and ipsilateral (blue dotted line) forelimb twitches. (B) Bar graphs depicting mean (+SEM) rates of twitching in nuchal muscle and ipsilateral and contralateral forelimb muscles. Data are pooled across 15 pups (C) Stacked plot showing the percentage of IO units that exhibited sharp, zero-latency activity in relation to nuchal, ipsilateral forelimb, contralateral forelimb, and hindlimb twitches. (D) Perievent histograms showing IO unit activity in relation to nuchal muscle and contralateral and ipsilateral forelimb twitches. Data are pooled across 17, 10, and 9 units, respectively. Upper and lower confidence bands ( $p < 0.01$  for each band) are

indicated by red and gray horizontal dashed lines, respectively. ipsi: ipsilateral; contra: contralateral. **(E)** Left: Stacked plot showing percentages of IO units that exhibited significant increase in firing in >10-ms (blue stack) time windows around twitches. Right: Perievent histograms showing IO unit activity in relation to twitches. Data pooled across 7 units. Ipsi=ipsilateral; contra=contralateral; ns=not significant.

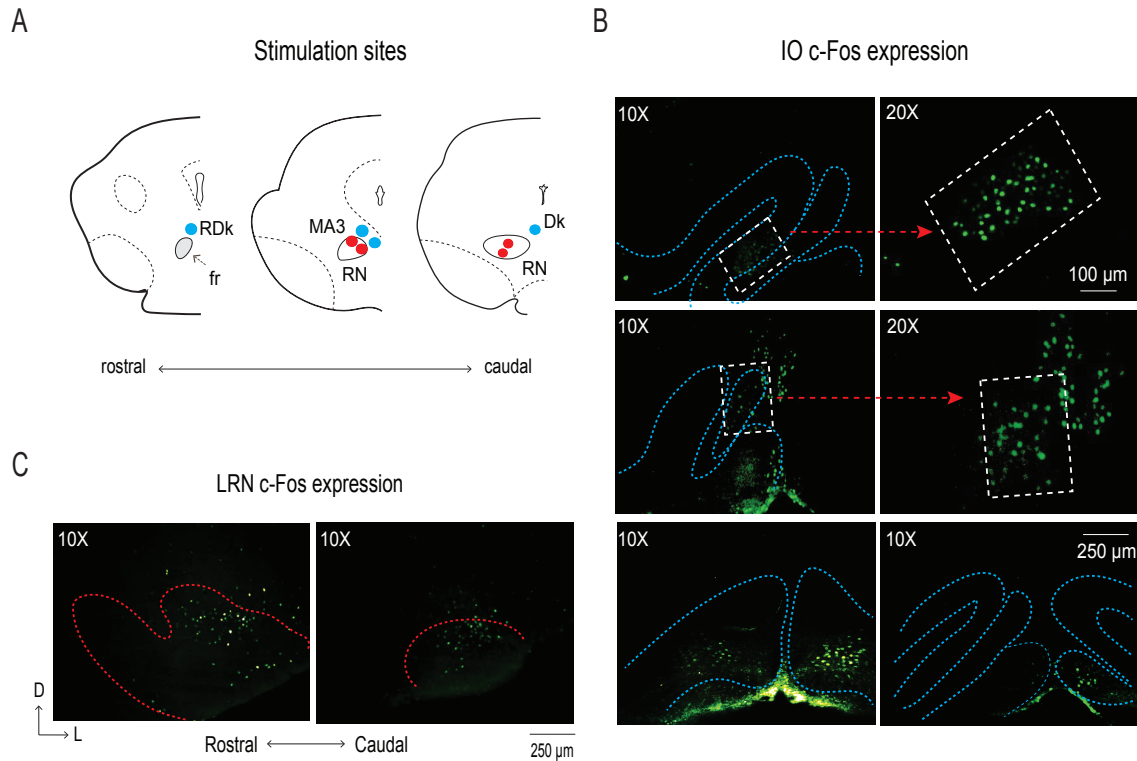

**Figure 4—figure supplement 1.** (A) Reconstruction of stimulation sites inside (red dots) and adjacent to (blue dots) the red nucleus (RN) in three coronal sections. (B) Representative photomicrographs in two different magnifications showing c-Fos expression in three sections of the IO (demarkated by blue dotted lines). (C) Representative photomicrographs showing c-Fos expression in two sections of the LRN (demarkated by red dotted lines). Rdk: rostral nucleus of Darkschewitsch; fr: fasciculus retroflexus; MA3: accessory oculomotor nucleus; Dk: nucleus Darkschewitsch; D=dorsal; L=lateral.

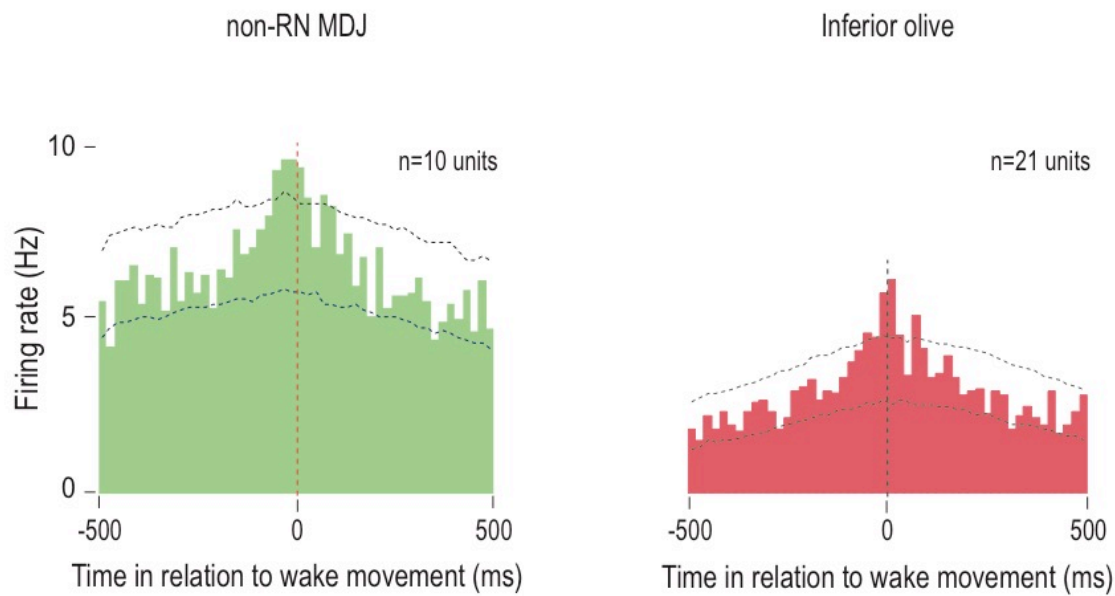

**Figure 5—figure supplement 1. (A)** Perievent histogram showing activity of twitch-preceding MDJ units (outside the RN) in relation to wake movements. Data pooled across 10 units and triggered on 586 wake movements. **(B)** Perievent histogram showing IO unit activity in relation to wake movements for those units that were significantly active in the  $\pm 10$ -ms time window around a twitch. Data pooled across 21 units and triggered on 747 wake movements.

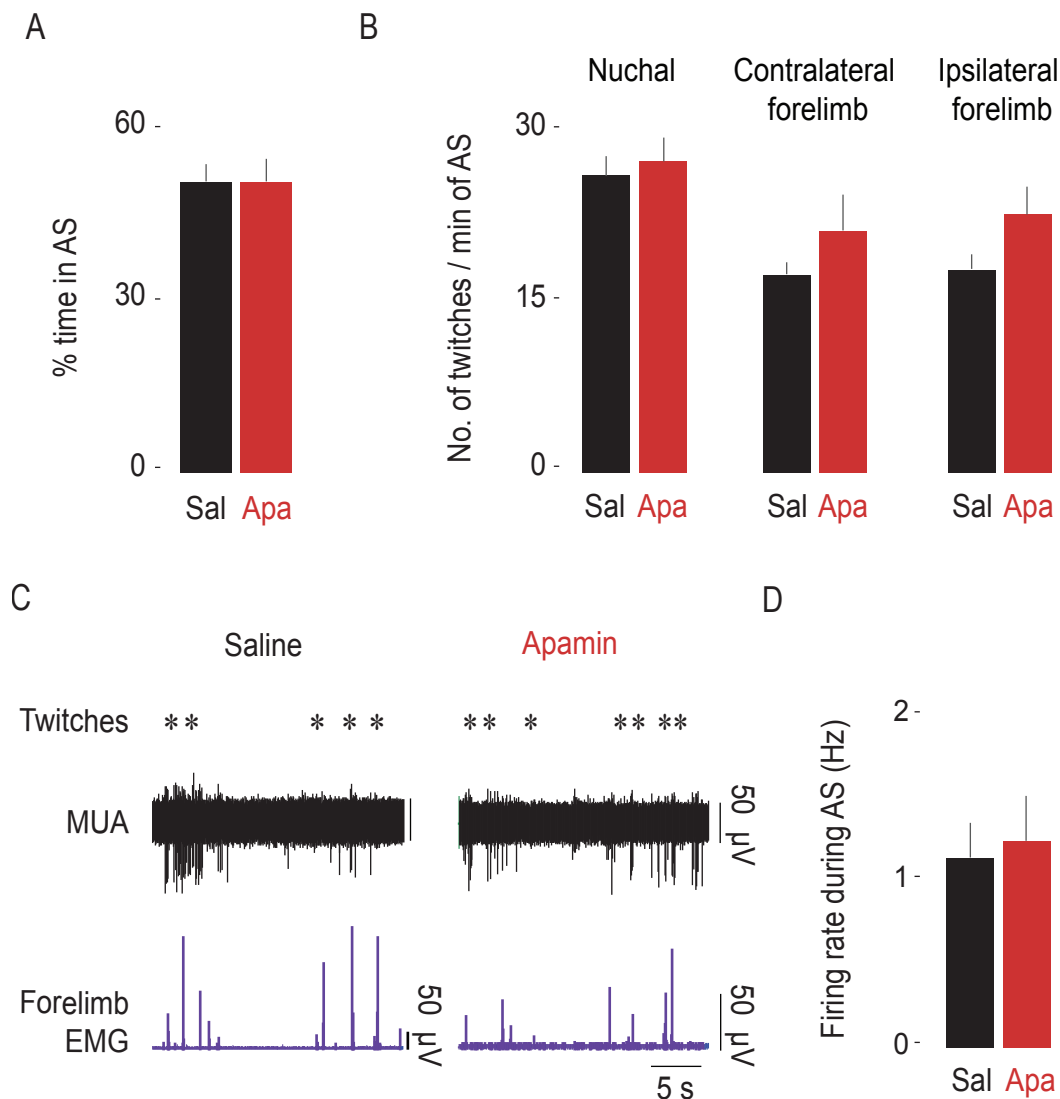

**Figure 6—figure supplement 1. Apamin does not affect sleep-wake behavior.** (A) Bar graphs showing the mean (+SEM) percentages of time spent in active sleep in saline (n=10 pups) and apamin groups (n=8 pups). (B) Bar graphs showing the mean (+SEM) rates of nuchal, contralateral and ipsilateral forelimb twitching in saline (n=10 pups) and apamin (n=8 pups) groups. (C) Representative recording of rectified forelimb EMG activity, and MUA in the IO during spontaneous sleep-wake cycling in saline (left) and apamin (right) groups. Asterisks denote twitches and gray horizontal bars denote wake movements as scored by the experimenter. (D) Bar graphs showing the mean (+SEM) firing rates of units during AS in saline (n=18 units) and apamin groups (n=22 units). Sal=saline; Apa=apamin.

## **ACKNOWLEDGMENTS**

The authors thank Alex Tiriac and Jimmy Dooley for helpful comments. Research was supported by grants from the National Institute of Health (R37 HD-081168 and R01 HD-063071) to MSB. The authors declare no competing financial interests.

## REFERENCES

- Akhmetshina D, Nasretdinov A, Zakharov A, Valeeva G, and Khazipov R.** The nature of the sensory input to the neonatal rat barrel cortex. *J Neurosci* 36: 9922-9932, 2016.
- Alstermark B, and Ekerot CF.** The lateral reticular nucleus: a precerebellar centre providing the cerebellum with overview and integration of motor functions at systems level. A new hypothesis. *J Physiol* 591: 5453-5458, 2013.
- Alstermark B, and Ekerot CF.** The lateral reticular nucleus; integration of descending and ascending systems regulating voluntary forelimb movements. *Front Comput Neurosci* 9: 102, 2015.
- Altman J.** Postnatal development of the cerebellar cortex in the rat. 3. Maturation of the components of the granular layer. *J Comp Neurol* 145: 465-513, 1972a.
- Altman J.** Postnatal development of the cerebellar cortex in the rat. I. The external germinal layer and the transitional molecular layer. *J Comp Neurol* 145: 353-397, 1972b.
- Altman J.** Postnatal development of the cerebellar cortex in the rat. II. Phases in the maturation of Purkinje cells and of the molecular layer. *J Comp Neurol* 145: 399-463, 1972c.
- Amarasingham A, Harrison MT, Hatsopoulos NG, and Geman S.** Conditional modeling and the jitter method of spike resampling. *J Neurophysiol* 107: 517-531, 2012.
- Andjus PR, Zhu L, Cesa R, Carulli D, and Strata P.** A change in the pattern of activity affects the developmental regression of the Purkinje cell polyinnervation by climbing fibers in the rat cerebellum. *Neuroscience* 121: 563-572, 2003.
- Arshavsky YI, Gelfand IM, Orlovsky GN, and Pavlova GA.** Messages conveyed by spinocerebellar pathways during scratching in the cat. I. Activity of neurons of the lateral reticular nucleus. *Brain Res* 151: 479-491, 1978.
- Azim E, and Alstermark B.** Skilled forelimb movements and internal copy motor circuits. *Curr Opin Neurobiol* 33: 16-24, 2015.
- Azim E, Jiang J, Alstermark B, and Jessell TM.** Skilled reaching relies on a V2a propriospinal internal copy circuit. *Nature* 508: 357-363, 2014.
- Benington JH, Woudenberg MC, and Heller HC.** Apamin, a selective SK potassium channel blocker, suppresses REM sleep without a compensatory rebound. *Brain Res* 692: 86-92, 1995.
- Blakemore SJ, Frith CD, and Wolpert DM.** The cerebellum is involved in predicting the sensory consequences of action. *Neuroreport* 12: 1879-1884, 2001.
- Blakemore SJ, Wolpert D, and Frith C.** Why can't you tickle yourself? *Neuroreport* 11: R11-16, 2000.
- Blumberg MS.** Beyond dreams: do sleep-related movements contribute to brain development? *Front Neurol* 1: 140, 2010.
- Blumberg MS, and Dooley JC.** Phantom limbs, neuroprosthetics, and the developmental origins of embodiment. *Trends Neurosci* 40: 603-612, 2017.
- Blumberg MS, Marques HG, and Iida F.** Twitching in sensorimotor development from sleeping rats to robots. *Curr Biol* 23: R532-537, 2013.
- Blumberg MS, Sokoloff G, Tiriac A, and Del Rio-Bermudez C.** A valuable and promising method for recording brain activity in behaving newborn rodents. *Dev Psychobiol* 57: 506-517, 2015.

- Brooks JX, Carriot J, and Cullen KE.** Learning to expect the unexpected: rapid updating in primate cerebellum during voluntary self-motion. *Nat Neurosci* 18: 1310-1317, 2015.
- Chung L.** A brief introduction to the transduction of neural activity into Fos signal. *Dev Reprod* 19: 61-67, 2015.
- Crapse TB, and Sommer MA.** Corollary discharge across the animal kingdom. *Nat Rev Neurosci* 9: 587-600, 2008.
- Cullen KE.** Sensory signals during active versus passive movement. *Curr Opin Neurobiol* 14: 698-706, 2004.
- Dale A, and Cullen KE.** The ventral posterior lateral thalamus preferentially encodes externally applied versus active movement: Implications for self-motion perception. *Cereb Cortex* 1-14, 2017.
- Davis WJ, Siegler MV, and Mpitoses.** Distributed neuronal oscillators and efference copy in the feeding system of Pleurobranchaea. *J Neurophysiol* 36: 258-274, 1973.
- de Zeeuw CI, Holstege JC, Calkoen F, Ruigrok TJ, and Voogd J.** A new combination of WGA-HRP anterograde tracing and GABA immunocytochemistry applied to afferents of the cat inferior olive at the ultrastructural level. *Brain Res* 447: 369-375, 1988.
- De Zeeuw CI, Simpson JI, Hoogenraad CC, Galjart N, Koekkoek SK, and Ruigrok TJ.** Microcircuitry and function of the inferior olive. *Trends Neurosci* 21: 391-400, 1998.
- Del Rio-Bermudez C, Plumeau AM, Sattler NJ, Sokoloff G, and Blumberg MS.** Spontaneous activity and functional connectivity in the developing cerebellorubral system. *J Neurophysiol* 116: 1316-1327, 2016.
- Del Rio-Bermudez C, Sokoloff G, and Blumberg MS.** Sensorimotor processing in the newborn rat red nucleus during active sleep. *J Neurosci* 35: 8322-8332, 2015.
- Devor A.** The great gate: control of sensory information flow to the cerebellum. *Cerebellum* 1: 27-34, 2002.
- Diamond A.** Close interrelation of motor development and cognitive development and of the cerebellum and prefrontal cortex. *Child Dev* 71: 44-56, 2000.
- Evans CG, Jing J, Proekt A, Rosen SC, and Cropper EC.** Frequency-dependent regulation of afferent transmission in the feeding circuitry of *Aplysia*. *J Neurophysiol* 90: 3967-3977, 2003.
- Fee MS, Mitra PP, and Kleinfeld D.** Central versus peripheral determinants of patterned spike activity in rat vibrissa cortex during whisking. *J Neurophysiol* 78: 1144-1149, 1997.
- Feinberg I, and Guazzelli M.** Schizophrenia--a disorder of the corollary discharge systems that integrate the motor systems of thought with the sensory systems of consciousness. *Br J Psychiatry* 174: 196-204, 1999.
- Feldman DE.** The spike-timing dependence of plasticity. *Neuron* 75: 556-571, 2012.
- Ford JM, Roach BJ, Faustman WO, and Mathalon DH.** Out-of-synch and out-of-sorts: dysfunction of motor-sensory communication in schizophrenia. *Biol Psychiatry* 63: 736-743, 2008.
- Fukushima K.** The interstitial nucleus of Cajal in the midbrain reticular formation and vertical eye movement. *Neurosci Res* 10: 159-187, 1991.
- Garden DL, Rinaldi A, and Nolan MF.** Active integration of glutamatergic input to the inferior olive generates bidirectional postsynaptic potentials. *J Physiol* 595: 1239-1251, 2017.
- Gellman R, Gibson AR, and Houk JC.** Inferior olivary neurons in the awake cat: detection of contact and passive body displacement. *J Neurophysiol* 54: 40-60, 1985.



**Gellman R, Houk JC, and Gibson AR.** Somatosensory properties of the inferior olive of the cat. *J Comp Neurol* 215: 228-243, 1983.

**Gramsbergen A, Schwartz P, and Prechtl HF.** The postnatal development of behavioral states in the rat. *Dev Psychobiol* 3: 267-280, 1970.

**Gui L, LaGrange LP, Larson RA, Gu M, Zhu J, and Chen QH.** Role of small conductance calcium-activated potassium channels expressed in PVN in regulating sympathetic nerve activity and arterial blood pressure in rats. *Am J Physiol Regul Integr Comp Physiol* 303: R301-310, 2012.

**Gymnopoulos M, Cingolani LA, Pedarzani P, and Stocker M.** Developmental mapping of small-conductance calcium-activated potassium channel expression in the rat nervous system. *J Comp Neurol* 522: 1072-1101, 2014.

**Harrison MT, and Geman S.** A rate and history-preserving resampling algorithm for neural spike trains. *Neural Comput* 21: 1244-1258, 2009.

**Horn KM, Pong M, and Gibson AR.** Discharge of inferior olive cells during reaching errors and perturbations. *Brain Res* 996: 148-158, 2004.

**Huang CC, Sugino K, Shima Y, Guo C, Bai S, Mensh BD, Nelson SB, and Hantman AW.** Convergence of pontine and proprioceptive streams onto multimodal cerebellar granule cells. *Elife* 2: e00400, 2013.

**Jouvet-Mounier D, Astic L, and Lacote D.** Ontogenesis of the states of sleep in rat, cat, and guinea pig during the first postnatal month. *Dev Psychobiol* 2: 216-239, 1970.

**Kakizawa S, Yamasaki M, Watanabe M, and Kano M.** Critical period for activity-dependent synapse elimination in developing cerebellum. *J Neurosci* 20: 4954-4961, 2000.

**Kano M, and Hashimoto K.** Activity-dependent maturation of climbing fiber to Purkinje cell synapses during postnatal cerebellar development. *Cerebellum* 11: 449-450, 2012.

**Karlsson KA, Gall AJ, Mohns EJ, Seelke AM, and Blumberg MS.** The neural substrates of infant sleep in rats. *PLoS Biol* 3: e143, 2005.

**Kawamura Y, Nakayama H, Hashimoto K, Sakimura K, Kitamura K, and Kano M.** Spike timing-dependent selective strengthening of single climbing fibre inputs to Purkinje cells during cerebellar development. *Nat Commun* 4: 2732, 2013.

**Keating JG, and Thach WT.** Nonclock behavior of inferior olive neurons: interspike interval of Purkinje cell complex spike discharge in the awake behaving monkey is random. *J Neurophysiol* 73: 1329-1340, 1995.

**Kirk MD, and Wine JJ.** Identified interneurons produce both primary afferent depolarization and presynaptic inhibition. *Science* 225: 854-856, 1984.

**Kreider JC, and Blumberg MS.** Mesopontine contribution to the expression of active 'twitch' sleep in decerebrate week-old rats. *Brain Res* 872: 149-159, 2000.

**Kremkow J, Perrinet LU, Masson GS, and Aertsen A.** Functional consequences of correlated excitatory and inhibitory conductances in cortical networks. *J Comput Neurosci* 28: 579-594, 2010.

**Lakke EA.** The projections to the spinal cord of the rat during development: a timetable of descent. *Adv Anat Embryol Cell Biol* 135: I-XIV, 1-143, 1997.

**Lang EJ, Apps R, Bengtsson F, Cerminara NL, De Zeeuw CI, Ebner TJ, Heck DH, Jaeger D, Jorntell H, Kawato M, Otis TS, Ozyildirim O, Popa LS, Reeves AM, Schweighofer N, Sugihara I, and Xiao J.** The roles of the olivocerebellar pathway in motor learning and motor control. A consensus paper. *Cerebellum* 16: 230-252, 2017.

**Lang EJ, Sugihara I, and Llinas R.** Differential roles of apamin- and charybdotoxin-sensitive K<sup>+</sup> conductances in the generation of inferior olive rhythmicity in vivo. *J Neurosci* 17: 2825-2838, 1997.

**Lee HS, and Mihailoff GA.** Convergence of cortical and cerebellar projections on single basilar pontine neurons: a light and electron microscopic study in the rat. *Neuroscience* 39: 561-577, 1990.

**Li WC, Higashijima S, Parry DM, Roberts A, and Soffe SR.** Primitive roles for inhibitory interneurons in developing frog spinal cord. *J Neurosci* 24: 5840-5848, 2004.

**Mason P.** *Medical Neurobiology*. New York: Oxford University Press, 2011.

**McVea DA, Murphy TH, and Mohajerani MH.** Large scale cortical functional networks associated with slow-wave and spindle-burst-related spontaneous activity. *Front Neural Circuits* 10: 103, 2016.

**Morris R, Vallester KK, Newton SS, Kearsley AP, and Whishaw IQ.** The differential contributions of the parvocellular and the magnocellular subdivisions of the red nucleus to skilled reaching in the rat. *Neuroscience* 295: 48-57, 2015.

**Mukherjee D, Yonk AJ, Sokoloff G, and Blumberg MS.** Wakefulness suppresses retinal wave-related neural activity in visual cortex. *J Neurophysiol* 118: 1190-1197, 2017.

**Nelson BJ, and Mugnaini E.** The rat inferior olive as seen with immunostaining for glutamate decarboxylase. *Anat Embryol (Berl)* 179: 109-127, 1988.

**Nicholson DA, and Freeman JH, Jr.** Addition of inhibition in the olivocerebellar system and the ontogeny of a motor memory. *Nat Neurosci* 6: 532-537, 2003.

**Onodera S, and Hicks TP.** A comparative neuroanatomical study of the red nucleus of the cat, macaque and human. *PLoS One* 4: e6623, 2009.

**Onodera S, and Hicks TP.** A projection linking motor cortex with the LM-supragenulate nuclear complex through the periaqueductal gray area which surrounds the nucleus of Darkschewitsch in the cat. *Prog Brain Res* 112: 85-98, 1996.

**Pivetta C, Esposito MS, Sigrist M, and Arber S.** Motor-circuit communication matrix from spinal cord to brainstem neurons revealed by developmental origin. *Cell* 156: 537-548, 2014.

**Poulet JF, and Hedwig B.** The cellular basis of a corollary discharge. *Science* 311: 518-522, 2006.

**Poulet JF, and Hedwig B.** New insights into corollary discharges mediated by identified neural pathways. *Trends Neurosci* 30: 14-21, 2007.

**Puro DG, and Woodward DJ.** Maturation of evoked climbing fiber input to rat cerebellar purkinje cells (I.). *Exp Brain Res* 28: 85-100, 1977a.

**Puro DG, and Woodward DJ.** Maturation of evoked mossy fiber input to rat cerebellar Purkinje cells (II.). *Exp Brain Res* 28: 427-441, 1977b.

**Requarth T, and Sawtell NB.** Plastic corollary discharge predicts sensory consequences of movements in a cerebellum-like circuit. *Neuron* 82: 896-907, 2014.

**Roffwarg HP, Muzio JN, and Dement WC.** Ontogenetic development of the human sleep-dream cycle. *Science* 152: 604-619, 1966.

**Ruigrok TJ, Sillitoe RV, and Voogd J.** Cerebellum and cerebellar connections In: *The Rat Nervous System*, edited by Paxinos G. UK: Elsevier Academic Press, 2014, p. 133-204.

**Saint-Cyr JA.** The projection from the motor cortex to the inferior olive in the cat. An experimental study using axonal transport techniques. *Neuroscience* 10: 667-684, 1983.

**Saint-Cyr JA, and Courville J.** Sources of descending afferents to the inferior olive from the upper brain stem in the cat as revealed by the retrograde transport of horseradish peroxidase. *J Comp Neurol* 198: 567-581, 1981.

**Schneider DM, Nelson A, and Mooney R.** A synaptic and circuit basis for corollary discharge in the auditory cortex. *Nature* 513: 189-194, 2014.

**Sedgwick EM, and Williams TD.** Responses of single units in the inferior olive to stimulation of the limb nerves, peripheral skin receptors, cerebellum, caudate nucleus and motor cortex. *J Physiol* 189: 261-279, 1967.

**Seelke AMH, and Blumberg MS.** The form and function of infant sleep: From muscle to neocortex. In: *The Oxford Handbook of Developmental Behavioral Neuroscience*, edited by Blumberg MS, Freeman JH, and Robinson SR. New York: Oxford University Press, 2010, p. 391-423.

**Sgritta M, Locatelli F, Soda T, Prestori F, and D'Angelo EU.** Hebbian Spike-Timing Dependent Plasticity at the Cerebellar Input Stage. *J Neurosci* 37: 2809-2823, 2017.

**Shimono T, Nosaka S, and Sasaki K.** Electrophysiological study on the postnatal development of neuronal mechanisms in the rat cerebellar cortex. *Brain Res* 108: 279-294, 1976.

**Sokoloff G, Plumeau AM, Mukherjee D, and Blumberg MS.** Twitch-related and rhythmic activation of the developing cerebellar cortex. *J Neurophysiol* 114: 1746-1756, 2015a.

**Sokoloff G, Uitermarkt BD, and Blumberg MS.** REM sleep twitches rouse nascent cerebellar circuits: Implications for sensorimotor development. *Dev Neurobiol* 75: 1140-1153, 2015b.

**Sommer MA, and Wurtz RH.** Brain circuits for the internal monitoring of movements. *Annu Rev Neurosci* 31: 317-338, 2008.

**Sommer MA, and Wurtz RH.** A pathway in primate brain for internal monitoring of movements. *Science* 296: 1480-1482, 2002.

**Sommer MA, and Wurtz RH.** What the brain stem tells the frontal cortex. I. Oculomotor signals sent from superior colliculus to frontal eye field via mediodorsal thalamus. *J Neurophysiol* 91: 1381-1402, 2004.

**Tiriac A, and Blumberg MS.** Gating of reafference in the external cuneate nucleus during self-generated movements in wake but not sleep. *Elife* 5: 2016.

**Tiriac A, Del Rio-Bermudez C, and Blumberg MS.** Self-generated movements with "unexpected" sensory consequences. *Curr Biol* 24: 2136-2141, 2014.

**Tiriac A, Sokoloff G, and Blumberg MS.** Myoclonic Twitching and Sleep-Dependent Plasticity in the Developing Sensorimotor System. *Curr Sleep Med Rep* 1: 74-79, 2015.

**Tiriac A, Uitermarkt BD, Fanning AS, Sokoloff G, and Blumberg MS.** Rapid whisker movements in sleeping newborn rats. *Curr Biol* 22: 2075-2080, 2012.

**van Kan PL, Gibson AR, and Houk JC.** Movement-related inputs to intermediate cerebellum of the monkey. *J Neurophysiol* 69: 74-94, 1993.

**Wang SS, Kloth AD, and Badura A.** The cerebellum, sensitive periods, and autism. *Neuron* 83: 518-532, 2014.

**Wang VY, and Zoghbi HY.** Genetic regulation of cerebellar development. *Nat Rev Neurosci* 2: 484-491, 2001.

**Watanabe M, and Kano M.** Climbing fiber synapse elimination in cerebellar Purkinje cells. *Eur J Neurosci* 34: 1697-1710, 2011.

**Welsh JP, Lang EJ, Sugihara I, and Llinas R.** Dynamic organization of motor control within the olivocerebellar system. *Nature* 374: 453-457, 1995.

**Williams PT, Kim S, and Martin JH.** Postnatal maturation of the red nucleus motor map depends on rubrospinal connections with forelimb motor pools. *J Neurosci* 34: 4432-4441, 2014.

**Wolpert DM, Miall RC, and Kawato M.** Internal models in the cerebellum. *Trends Cogn Sci* 2: 338-347, 1998.

**Xu W, Jones S, and Edgley SA.** Event time representation in cerebellar mossy fibres arising from the lateral reticular nucleus. *J Physiol* 591: 1045-1062, 2013.

**Yang JW, An S, Sun JJ, Reyes-Puerta V, Kindler J, Berger T, Kilb W, and Luhmann HJ.** Thalamic network oscillations synchronize ontogenetic columns in the newborn rat barrel cortex. *Cereb Cortex* 23: 1299-1316, 2013.

**Yang Y, Cao P, Yang Y, and Wang SR.** Corollary discharge circuits for saccadic modulation of the pigeon visual system. *Nat Neurosci* 11: 595-602, 2008.

**Zuk A, Rutherford JG, and Gwyn DG.** Projections from the interstitial nucleus of Cajal to the inferior olive and to the spinal cord in cat: a retrograde fluorescent double-labeling study. *Neurosci Lett* 38: 95-101, 1983.
